# Supplementary material for: Assessing the limitations of the existing physician directory for measuring electronic health record (EHR) adoption rates among physicians in Connecticut, USA: cross-sectional study
Source: PubMed Central journal article supplement — BMJ Open. 2012 Nov 12;2(6):e001066. doi: 10.1136/bmjopen-2012-001066 (PMC3533109; doi:10.1136/bmjopen-2012-001066), 2012-11-12
Supplement: bmjopen-2012-001066.draft_revisions.pdf [file bmjopen-2012-001066.draft_revisions.pdf]

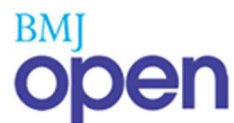

**Physician Directory: A challenge to measuring electronic health record adoption in a cohort of Connecticut physicians**

|                                 |                                                                                                                                                                  |
|---------------------------------|------------------------------------------------------------------------------------------------------------------------------------------------------------------|
| Journal:                        | <i>BMJ Open</i>                                                                                                                                                  |
| Manuscript ID:                  | bmjopen-2012-001066                                                                                                                                              |
| Article Type:                   | Research                                                                                                                                                         |
| Date Submitted by the Author:   | 27-Feb-2012                                                                                                                                                      |
| Complete List of Authors:       | Tikoo, Minakshi; University of Connecticut, Community Medicine & Health Care                                                                                     |
| <b>Primary Subject Heading</b>: | Health informatics                                                                                                                                               |
| Secondary Subject Heading:      | Health services research                                                                                                                                         |
| Keywords:                       | Quality in health care < HEALTH SERVICES ADMINISTRATION & MANAGEMENT, physician directory, health information exchange, evaluation of HIEs, rate of EHR adoption |
|                                 |                                                                                                                                                                  |

SCHOLARONE™  
Manuscripts

## Physician Directory: A challenge to measuring electronic health record adoption in a cohort of Connecticut physician

### ABSTRACT

**Objective** To assess the challenges posed by the existing physician directory in the measurement of electronic health record (EHR) adoption rates among a cohort of Connecticut physicians.

**Design** A population-based mailing was undertaken to assess the number of physicians practicing in Connecticut. This mailing used a list of licensed physicians in Connecticut.

**Measurements** Information about practice site, practices pertaining to storing of patient information, sources of revenue, and preferred method for receiving survey. Practice status in Connecticut, measured by yes and no. Demographic information was collected on gender, year of birth, race, and ethnicity.

**Results** The response rate for the postcard mailing was 16% (2,583/16,462). Of the 16,462 unduplicated consumers in our universe, 206 (1%) were retired and 4038 (25%) did not practice in CT. Of the 2,583 valid postcard responses we received, 1,786 were for physicians practicing in CT. Sixty (3%) of these responses did not specify a preferred method for receiving the full physician survey; 26 physicians refused to participate in the survey; 1,786 surveys were sent out using each physician's requested method for receiving the survey, i.e. web-based, regular mail, or telephone. As of February 2012, 785 physicians had returned surveys, resulting in a response rate of 44%.

**Limitations** The postcard response rate based on the unduplicated lists of 21% is low. We may be missing physician populations which could greatly affect the indicators being used to measure change in electronic health record adoption rates.

**Conclusions** It is difficult to obtain an accurate physician count of practicing physicians in Connecticut from the existing lists. States that are participating in the projects funded under various Office of the National Coordinator for Health Information Technology (ONC) initiatives must focus on getting an accurate count of the physicians practicing in their state, since their progress is being measured based on this key number.

### INTRODUCTION

The influx of American Recovery and Reinvestment Act of 2009 (ARRA) funding through the implementation of the Health Information Technology for Economic and Clinical Health (HITECH) Act provides funds to small, privately-owned primary care practices, federally-qualified health centers, critical area access hospitals, and other community health centers to implement and adopt health information technologies. These technologies include electronic health records (EHRs), e-prescribing systems, and laboratory information systems. These funds were made available to all states through multiple initiatives, such as the Health Information Technology Extension Program, State Health Information Exchange (HIE) Cooperative Agreement Program, and Community College Consortia to Educate Health Information Technology Professionals Program. Much has been written about the

1  
2 advantages of using HIEs and their resulting benefits to improving quality of care, patient safety, and  
3 efficiency of delivering care.(1-3)  
4

## 5 6 **BACKGROUND**

7  
8 The ONC has invested about \$30 billion to implement the HITECH Act.(4-7) The Health  
9 Information Technology Extension Program provides each state with funds to increase its physicians'  
10 EHR adoption rate. Similarly, under the HIE program, states are expected to build infrastructure and  
11 mechanisms that support the exchange of health information among physicians' offices, hospitals,  
12 laboratories, pharmacies, registries, etc. The HIE initiative funds 56 Health Information Exchanges  
13 covering all states. One metric indicative of HIE success is the rate of change in the EHR adoption rate  
14 among physicians over the course of this four-year initiative. This metric is linked to another outcome  
15 measure: the number of physicians who successfully demonstrate the exchange of summary  
16 documents with another provider, the state, or a regional HIE. To this end, accurate data on  
17 practicing physicians by state are needed. Data sources that list practicing physicians in a state,  
18 however, are limited (8), since generating accurate lists of unduplicated physicians in a state is a  
19 labor-intensive activity. As a result, this indicator presents a challenge, since it assumes that there is  
20 an existing accurate list of the physician population that can be used to survey the physicians for EHR  
21 adoption rates. Establishing an accurate baseline list of physicians is important, since progress on  
22 many HIT indicators will be based upon the number of physicians that adopt and implement EHRs and  
23 other HIT practices. These physicians are eligible for incentives from the Centers for Medicare and  
24 Medicaid Services (CMS).(9) Currently, many states realize that their physicians' lists are inaccurate;  
25 this makes it difficult for them to calculate this basic measure of existing physicians that use certified  
26 EHRs.  
27  
28  
29  
30  
31  
32  
33  
34  
35  
36  
37  
38  
39  
40  
41  
42

43  
44 In the first year of the HIE cooperative agreements, states have been working to establish a  
45 baseline for existing rates of EHR adoption. As part of this grant, ONC has established multiple  
46 communities of practice (CoP) targeting important performance outcome measures, including the e-  
47 prescribing CoP, the Lab CoP, provider directory CoP, and the Security and Privacy CoP. The "Provider  
48 Directory CoP" has been discussing the challenges associated with getting and subsequently  
49 maintaining an accurate list/directory of providers, which are related to the fact that physicians  
50 practice in multiple settings, change affiliations, and may not practice in all states in which they hold  
51 licenses.  
52  
53  
54  
55  
56  
57  
58  
59  
60

1  
2 In December 2010, the Centers for Disease Control and Prevention (CDC) released statewide  
3 results of EHR adoption rates, based on a mailed supplement to the National Ambulatory Medical  
4 Care Survey (NAMCS).(10) This supplement was started in 2008. The CDC study reports that 48% of  
5 office-based physicians use an EHR, 22% use a basic system, and 7% use a fully-functional EHR. These  
6 numbers are slightly higher than those reported in an earlier study; which reported 4% of the  
7 physicians as operating an extensive, fully-functional electronic system, while 13% had a basic  
8 system.(11)

9  
10  
11  
12  
13  
14  
15 Currently, these data are the only state-level estimates available that systematically record EHR  
16 adoption rates. There are, however, two limitations that impact the NAMCS data's applicability and  
17 usefulness. First, the supplement questionnaire does not ask the key question about whether or not  
18 the EHR in use is certified.(4) Second, the EHR adoption questions were asked at the practice level  
19 and not at the physician level. This distinction is important because the incentives which CMS is  
20 promoting are at the physician level and not at the practice level.

21  
22  
23  
24  
25  
26  
27 **Connecticut Health Information Exchange Landscape** The Health Information Technology  
28 Exchange of Connecticut (HITE-CT), a quasi-public agency, was created by the [Public Act 10-117](#), "*An*  
29 *Act Concerning Revisions to Public Health Related Statutes and the Establishment of the Health*  
30 *Information Technology Exchange of Connecticut*," Sec. 82-90,96 (codified at CGS §19a-750(c)(1))  
31 (12), by the 2010 Connecticut General Assembly and Governor Rell. It is managed by an appointed  
32 Board of Directors who held their first meeting in October 2010 to coordinate and oversee Health  
33 Information Exchange (HIE) activities starting in January 1, 2011. Each board member represents a  
34 constituent stakeholder group, such as consumer or consumer advocates, primary care physicians,  
35 pharmacists, employer and/or business groups.

36  
37  
38  
39  
40  
41  
42  
43  
44  
45  
46  
47  
48  
49  
50  
51  
52  
53  
54  
55  
56  
57  
58  
59  
60  
According to NAMCS estimates for Connecticut, 48% of office-based physicians use an EHR and  
15% report having a basic EHR system (10), while another recent evaluation study puts this number at  
36%.(13) This paper addresses the challenges of measuring the rate of EHR adoption among  
physicians on this list.

## METHODS

**Data** The Connecticut Department of Public Health contracted with the University of Connecticut Health  
Center (UCHC) to evaluate its Health Information Technology and Exchange (HITE) Cooperative Agreement,  
funded by the Office of the National Coordinator (ONC). The contract period for this evaluation is 7/1/2010-

1  
2 3/14/2014. This evaluation uses mixed methods, namely survey research and in-depth interviews. A family of  
3 surveys is being undertaken to measure CT-HITE's impact, such as physician EHR adoption rate, e-prescribing  
4 practices, laboratory readiness for interoperability and states ability to sustain this effort after the federal  
5 funds are expended. All studies were reviewed by the IRB at UCHC.  
6  
7

8  
9 For the physician survey implementation, the evaluators received a list from the Department of Public  
10 Health (DPH), which issues licenses of practice to physicians, generated a list of 16,618 physicians in  
11 May 2011 and another list of 5,283 physicians from the Department of Social Services Medicaid  
12 physician list. No phone numbers or e-mail addresses were available on this list. These lists were  
13 combined and after removing duplicates the final list contained a cohort of 18,642 physicians.  
14  
15

16  
17  
18 Members of the board of directors of HITE-CT believed that there were about 8,000 physicians  
19 actively practicing in Connecticut. Due to the discrepancy between the actual list and the number of  
20 physicians believed to be practicing in Connecticut, a two-step survey process was implemented to  
21 ascertain the list's accuracy. First, a postcard was mailed to all the physicians on the list. Second,  
22 surveys were mailed to physicians who responded to the postcard, to assess physicians use of EHRs;  
23 their opinions about their EHR's utility; their familiarity with HIE; and their opinions about barriers  
24 and incentives that may impact HIE implementation. This paper discusses the responses to the  
25 postcard.  
26  
27

28  
29  
30  
31  
32  
33  
34 **Postcard Survey instrument** The postcard asked 10 questions. These questions included whether  
35 the person practiced in Connecticut, age, race, ethnicity, gender, practice site, methods used to store  
36 medical record data, sources of patient revenue, and preferred methods for receiving the subsequent  
37 survey. Figure 1 contains a picture of the postcard.  
38  
39

40  
41 **Postcard Administration** Every licensed physician who was on the list as of May 2011 was mailed  
42 a postcard through the US postal system. A total of 18,642 postcards was mailed.  
43  
44

45 **Analysis** Responses to the first mailing were analyzed using SQL and SPSS.  
46  
47  
48  
49  
50  
51  
52  
53  
54  
55  
56  
57  
58  
59  
60

Figure 1: Postcard Questions

Please complete the following survey and mail the postcard

|                                                                                                                                                                                                                                                                                                                                                                                                       |                                                                                                                                                                                                                                                                                                                         |
|-------------------------------------------------------------------------------------------------------------------------------------------------------------------------------------------------------------------------------------------------------------------------------------------------------------------------------------------------------------------------------------------------------|-------------------------------------------------------------------------------------------------------------------------------------------------------------------------------------------------------------------------------------------------------------------------------------------------------------------------|
| 1. Do you currently practice in the state of Connecticut?<br><input type="radio"/> Yes <input type="radio"/> No <input type="radio"/> Retired                                                                                                                                                                                                                                                         | ID                                                                                                                                                                                                                                   |
| 2. Your main practice site is :<br><input type="radio"/> Single specialty group/partnership<br><input type="radio"/> Multi specialty group/partnership<br><input type="radio"/> Solo practice                                                                                                                                                                                                         | 8. Roughly what percent of your patient revenue comes from the following? (Percentage should total 100%)<br>Medicare _____<br>Medicaid (including Husky, SAGA Medicaid LIA & Title 19) _____<br>Private insurance _____<br>Patient payments _____<br>Other (please specify) _____                                       |
| 3. How does your main practice site store patient information?<br><input type="radio"/> Paper medical records/charts stored in cabinets<br><input type="radio"/> Computerized system which stores scanned copies of paper records (DIMS)<br><input type="radio"/> Electronic Health Record<br><input type="radio"/> Both –paper and computerized<br><input type="radio"/> Other please specify: _____ | 9. Which method of survey administration do you prefer?<br><input type="radio"/> Web-based (we will email you a survey link)<br><input type="radio"/> Regular mail<br><br><input type="radio"/> Telephone interview<br><input type="radio"/> In Person interview<br><input type="radio"/> Do not want to receive survey |
| 4. What is the year of your birth? _____                                                                                                                                                                                                                                                                                                                                                              | Please supply us with the following information<br><br>Email address: _____<br><br>Telephone number: _____                                                                                                                                                                                                              |
| 5. What is your gender? <input type="radio"/> Male <input type="radio"/> Female                                                                                                                                                                                                                                                                                                                       |                                                                                                                                                                                                                                                                                                                         |
| 6. What is your ethnicity? <input type="radio"/> Hispanic or Latino<br><input type="radio"/> Not Hispanic or Latino                                                                                                                                                                                                                                                                                   |                                                                                                                                                                                                                                                                                                                         |
| 7. What is your race?<br><input type="radio"/> White<br><input type="radio"/> Black/African American<br><input type="radio"/> Asian<br><input type="radio"/> Native Hawaiian/Other Pacific Islander<br><input type="radio"/> American Indian/Alaska Native                                                                                                                                            |                                                                                                                                                                                                                                                                                                                         |

## RESULTS

We received 3,459 of the 18,642 postcards that were mailed. Of these, 876 were returned undelivered; 59 respondents practiced in Connecticut but did not chose a preferred method for receiving a survey; and 1,740 were valid addresses with an identified method for receiving the physician survey. Additionally, 10 postcards were returned with a note that the physician had received two postcards. This led us to decide to review the list closely for duplicate physicians. To do this, we systematically used the internet to search for telephone numbers for practices containing possible duplicate physicians, and we then called these practices to confirm that the physician on our list was still practicing at the address listed. Between the mailing and telephone calls to practices, 2,180 were identified as duplicates, 206 physicians were identified as having retired and 4038 were identified as not practicing in CT. A second mailing of 698 postcards was completed in November 2011 with updated addresses for postcards that were returned to us as undelivered from the first mailing.

**Response rate** The overall postcard response rate was 16%. Of the 16,462 unduplicated physicians in the master list, 30 had died, 206 were retired, 4038 no longer practiced in CT, and 15 did not specify whether or not they practiced in CT. This left an adjusted target population of 12,173

physicians; the response rate for this target population was 21%. Table 1 provides the results from the process undertaken to clean the master physician list.

Table 1: Cleaning physician list

|                                                            | N     | %     |
|------------------------------------------------------------|-------|-------|
| Physician list received from CT-DPH                        | 18642 |       |
| Duplicates in the list                                     | 2056  |       |
| Triplicates in the list                                    | 100   |       |
| Quadruplicates in the list                                 | 12    |       |
| Quintuplicates in the list                                 | 12    |       |
| Unduplicated Physician list                                | 16462 |       |
| <b>Responses to the Physician postcard</b>                 |       |       |
| No response                                                | 13003 | 79.0% |
| Postcard returned due to invalid address                   | 876   | 5.3%  |
| Postcard returned completed                                | 2583  | 15.7% |
| <b>Physicians Excluded Due to Death, Retirement, etc.</b>  |       |       |
| Died                                                       | 30    | 0.2%  |
| Retired                                                    | 206   | 1.3%  |
| No Longer Practices in CT                                  | 4038  | 24.5% |
| Postcard returned: Unknown if Physician Practices in CT    | 15    | 0.1%  |
| Target Population After Exclusions                         | 12173 |       |
| Adjusted Postcard Response Rate Based on Target Population |       | 21.3% |
| <b>Physicians Receiving Full Survey</b>                    |       |       |
| Refused to Participate in Survey                           | 26    |       |
| Postcard Returned; No Preferred Survey Method Specified    | 60    |       |
| Physician Practices in CT; Survey Sent                     | 1786  |       |
| <i>Response rate for survey</i>                            | 785   | 44.0% |

**Characteristics of respondents** The age of the physicians ranged from 28-91 years, representing a mean age of 55 years and a standard deviation of 12 years. Sixty-two percent of the respondents were men and 27% were women. Eighty-two percent of the physicians selected white, while 11% selected Asian and 2% selected black as their race. Only 4% of the respondents were of Hispanic origin.

**Characteristics of the practice site** Most physicians (53%) reported practicing in a single-specialty group practice, 22% of the physicians practiced in a multi-specialty group practice, and 20% had a solo practice.

**Handling of patient records** Most physicians (36%) reported using only paper records, 29% reported using a combination of paper and computerized records, 26% were using EHRs, 5% were using scanned images of paper records, and 3% were in the process of moving to an EHR.

**Source of patient revenue** When asked about income, 43% reported that more than 30% of their revenue came from Medicare, 19% reported that more than 30% of their revenue came from Medicaid, 66% reported that more than 30% of their revenue came from private insurance, and about 7% reported that more than 30% of their revenue came from patient payments.

**Selection of method for survey administration** A majority (54%) of the physicians wanted to receive their survey in the mail, while 41% preferred the web-based survey. Demographic and sample characteristics are summarized in table 2.

Table 2: Demographics and other sample characteristics

|                                                                   | <b>N=1799</b>    | <b>%</b> |
|-------------------------------------------------------------------|------------------|----------|
| Mean Age                                                          | 55 years (SD 12) |          |
| Range                                                             | 28-91 years      |          |
| <b>Gender</b>                                                     |                  |          |
| Male                                                              | 1110             | 61.7%    |
| Female                                                            | 492              | 27.3%    |
| Missing                                                           | 197              | 11.0%    |
| <b>Ethnicity</b>                                                  |                  |          |
| Hispanic or Latino origin                                         | 64               | 3.6%     |
| Not Hispanic or Latino                                            | 1678             | 93.3%    |
| Missing                                                           | 57               | 3.2%     |
| <b>Race</b>                                                       |                  |          |
| White                                                             | 1481             | 82.3%    |
| Black/African-American                                            | 44               | 2.4%     |
| Asian                                                             | 198              | 11.0%    |
| Native Hawaiian/Other Pacific Islander                            | 10               | 0.6%     |
| American Indian                                                   | 3                | 0.2%     |
| Multiple Races                                                    | 0                | 0.0%     |
| Missing                                                           | 63               | 3.5%     |
| <b>Practice Type</b>                                              |                  |          |
| Solo practice                                                     | 365              | 20.3%    |
| Single specialty group                                            | 950              | 52.8%    |
| Multi-specialty group                                             | 403              | 22.4%    |
| Did not respond                                                   | 81               | 4.5%     |
| <b>How does your main practice site store patient information</b> |                  |          |
| Paper medical records/charts stored in cabinets                   | 649              | 36.1%    |
| Both-Paper and computerized                                       | 517              | 28.7%    |



|                                                                         | N=1799 | %     |
|-------------------------------------------------------------------------|--------|-------|
| Electronic Health Record                                                | 473    | 26.3% |
| Computerized system which stores scanned copies of paper records (DIMS) | 88     | 4.9%  |
| Other                                                                   | 48     | 2.7%  |
| Multiple Storage Methods                                                | 12     | 0.7%  |
| Missing                                                                 | 12     | 0.7%  |
| <b>% of patient revenue, Medicare</b>                                   |        |       |
| None                                                                    | 109    | 6.1%  |
| Less than 30                                                            | 478    | 26.6% |
| More than 30                                                            | 769    | 42.7% |
| Missing                                                                 | 443    | 24.6% |
| <b>% of patient revenue, Medicaid</b>                                   |        |       |
| None                                                                    | 132    | 7.3%  |
| Less than 30                                                            | 869    | 48.3% |
| More than 30                                                            | 333    | 18.5% |
| Missing                                                                 | 465    | 25.8% |
| <b>% of patient revenue, Private Insurance</b>                          |        |       |
| None                                                                    | 36     | 2.0%  |
| Less than 30                                                            | 321    | 17.8% |
| More than 30                                                            | 1180   | 65.6% |
| Missing                                                                 | 262    | 14.6% |
| <b>% of patient revenue, Patient Payments</b>                           |        |       |
| None                                                                    | 72     | 4.0%  |
| Less than 30                                                            | 1012   | 56.3% |
| More than 30                                                            | 125    | 6.9%  |
| Missing                                                                 | 590    | 32.8% |
| <b>% of patient revenue, Other</b>                                      |        |       |
| None                                                                    | 163    | 9.1%  |
| Less than 30                                                            | 138    | 7.7%  |
| More than 30                                                            | 80     | 4.4%  |
| Missing                                                                 | 1418   | 78.8% |
| <b>Preferred method of survey administration</b>                        |        |       |
| Web-based                                                               | 736    | 40.9% |
| Regular mail                                                            | 962    | 53.5% |
| Telephone interview                                                     | 21     | 1.2%  |
| In-person interview                                                     | 12     | 0.7%  |
| Multiple                                                                | 9      | 0.5%  |
| Missing                                                                 | 59     | 3.3%  |

## DISCUSSION

1  
2 The physician list was inadequate for the purpose of administering the survey. DPH licenses  
3 physicians to practice in Connecticut, but does not maintain a list of practicing physicians. We found  
4 that physicians move, retire, graduate from medical school, and die. Any one of these issues by itself  
5 does not create a lot of noise, but together these issues render the list suspect for calculating  
6 outcome measures.  
7  
8  
9  
10

11 Currently, DPH uses both electronic and paper processes for license renewal. We recommend  
12 that the state licensing and renewal application add two questions that may improve the list  
13 substantially over a period of one year, given that all physicians have to renew their licenses annually.  
14 First, physicians should be asked whether or not they practice in the state. Second, it may be useful to  
15 have all physicians designate the sites at which they practice; these sites should be flagged as either  
16 primary or secondary sites. This is important because, even though physicians may practice at  
17 multiple sites, we want them to respond to our survey based on their experience at their primary site.  
18 Third, it may be time to mandate that all renewals be done electronically; this would eliminate the  
19 process of merging the two sources of license renewal data to obtain a master list. Last, a subset of  
20 these physicians will be applying to CMS for incentives. As a result, the projected number of  
21 physicians who are likely to apply for these incentives could be off by a significant magnitude.  
22  
23  
24  
25  
26  
27  
28  
29  
30  
31

32 There has been pressure on the states that received HIE grants to document baseline EHR  
33 adoption rates quickly. This may not be feasible, given that it took a year to get the survey out into  
34 the field and then realize that the list was not accurate. We were concurrently cleaning the list as we  
35 were sending surveys out to physicians. It would have been more prudent to first clean the list and  
36 then send out the postcard. Also, ONC would be better off allowing states to use the rates estimated  
37 by NAMCS as their baselines; this would allow states the necessary time to get their provider  
38 directories in order and to then implement a statewide physician survey based on the population or a  
39 sample to measure change overtime in EHR adoption rates.  
40  
41  
42  
43  
44  
45  
46

47 **Limitations** The postcard response rate is a challenge as the state tries to estimate how many of  
48 its physicians will apply and attest successfully to receive incentive payments from CMS. The  
49 evaluation team is calling the practices in the list to identify duplicates, since at least 50% of the  
50 physicians indicate that they practice at more than one site. Cleaning of the physician list will need to  
51 be an ongoing process; as every year new physicians are added to the existing list of licensed  
52 physicians.  
53  
54  
55  
56  
57  
58  
59  
60

## CONCLUSION

It is extremely difficult for states that do not have a centralized provider directory to maintain an accurate list of practicing providers. For such states, the environment scan data incorporated in the statewide strategic and operational plan submitted to the ONC may have some errors and limitations. Even though they might be the best baseline data available at the state level, ONC will need to be cautious in using this indicator, since the effort to clean the physician list is up to the state.

Measuring progress on the EHR adoption indicator can be accurate only if all states use a systematic process for cleaning their lists of practicing physicians. In the state of Connecticut, we were able to remove duplicates the list using a simple process of checking the internet, followed by calls to doctors' offices. Other states may want to follow this simple process if they do not have the funds available to buy systems and hire staff whose sole responsibility is to clean their physician list. As a result, each list's accuracy will vary proportional to the time and resources spent on cleaning the list.

Funding: This work was supported by Award Number 90HT0043/01 from the ONC.

## References

- (1) Wright A, Soran C, Jenter CA, Volk LA, Bates DW, Simon SR. Physician attitudes toward health information exchange: Results of a statewide survey. *J Am Med Inform Assoc* 2010;17(1):66-70.
- (2) Vest JR, Zhao H, Jaspersen J, Gamm LD, Ohsfeldt RL. Factors motivating and affecting health information exchange usage. *J Am Med Inform Assoc* 2011;18(2):143-149.
- (3) Adler-Milstein J, Bates DW, Jha AK. A survey of health information exchange organizations in the united states: Implications for meaningful use. *Ann Intern Med* 2011;154(10):666-671.
- (4) Health information technology: initial set of standards, implementation specifications, and certification criteria for electronic health record technology. Interim final rule. *Fed Regist* 2010;75(8):2013-2047.
- (5) Blumenthal D. Stimulating the adoption of health information technology. *W V Med J* 2009 May-Jun;105(3):28-29.
- (6) Blumenthal D, Tavenner M. The "meaningful use" regulation for electronic health records. *N Engl J Med* 2010 Aug 5;363(6):501-504.
- (7) Blumenthal D. Launching HITECH. *N Engl J Med* 2010 Feb 4;362(5):382-385.

- 1  
2 (8) Jha AK, Doolan D, Grandt D, Scott T, Bates DW. The use of health information technology in seven  
3 nations. *Int J Med Inf* 2008;77(12):848-854.  
4  
5  
6 (9) Centers for Medicare & Medicaid Services. The official web-site for the Medicare and Medicaid  
7 EHR Incentive Program.  
8 [http://www.cms.gov/EHRIncentivePrograms/01\\_Overview.asp#TopOfPage](http://www.cms.gov/EHRIncentivePrograms/01_Overview.asp#TopOfPage). Accessed 20 November,  
9 2010.  
10  
11  
12 (10) Hsiao CJ, Beatty PC, Hing E, Woodwell DA, Rechtsteiner EA, Sisk JE. Electronic medical  
13 record/electronic health record systems of office-based physicians: United States, 2009 and  
14 preliminary 2010. December 2010; Available at:  
15 [http://www.cdc.gov/nchs/data/hestat/emr\\_ehr\\_09/emr\\_ehr\\_09.pdf](http://www.cdc.gov/nchs/data/hestat/emr_ehr_09/emr_ehr_09.pdf). Accessed 14 November, 2011.  
16  
17  
18 (11) DesRoches CM, Campbell EG, Rao SR, Donelan K, Ferris TG, Jha A, et al. Electronic health records  
19 in ambulatory care - A national survey of physicians. *N Engl J Med* 2008;359(1):50-60.  
20  
21  
22 (12) State of Connecticut. Substitute Senate Bill No. 428, Public Act No. 10-117, An act concerning  
23 revisions to public health related statues and the establishment of health information technology  
24 exchange of Connecticut. Accessed 8 December, 2011.  
25  
26  
27 (13) Tikoo M. Connecticut's Health Information Technology Exchange Evaluation Process: Baseline  
28 Assessments & Updates, <http://www.cicats.uconn.edu/pdf/bmi/HITECT-Report.pdf>. Accessed 8  
29 December, 2011.  
30  
31  
32  
33  
34  
35  
36  
37  
38  
39  
40  
41  
42  
43  
44  
45  
46  
47  
48  
49  
50  
51  
52  
53  
54  
55  
56  
57  
58  
59  
60

**STROBE 2007 (v4) checklist of items to be included in reports of observational studies in epidemiology\***  
**Checklist for cohort, case-control, and cross-sectional studies (combined)**

| Section/Topic             | Item # | Recommendation                                                                                                                                                                                                                                                                                                                                                                                                                                                         | Reported on page # |
|---------------------------|--------|------------------------------------------------------------------------------------------------------------------------------------------------------------------------------------------------------------------------------------------------------------------------------------------------------------------------------------------------------------------------------------------------------------------------------------------------------------------------|--------------------|
| Title and abstract        | 1      | (a) Indicate the study's design with a commonly used term in the title or the abstract                                                                                                                                                                                                                                                                                                                                                                                 | 1                  |
|                           |        | (b) Provide in the abstract an informative and balanced summary of what was done and what was found                                                                                                                                                                                                                                                                                                                                                                    |                    |
| <b>Introduction</b>       |        |                                                                                                                                                                                                                                                                                                                                                                                                                                                                        |                    |
| Background/rationale      | 2      | Explain the scientific background and rationale for the investigation being reported                                                                                                                                                                                                                                                                                                                                                                                   | 2                  |
| Objectives                | 3      | State specific objectives, including any pre-specified hypotheses                                                                                                                                                                                                                                                                                                                                                                                                      | 3                  |
| <b>Methods</b>            |        |                                                                                                                                                                                                                                                                                                                                                                                                                                                                        |                    |
| Study design              | 4      | Present key elements of study design early in the paper                                                                                                                                                                                                                                                                                                                                                                                                                | 4                  |
| Setting                   | 5      | Describe the setting, locations, and relevant dates, including periods of recruitment, exposure, follow-up, and data collection                                                                                                                                                                                                                                                                                                                                        | 4                  |
| Participants              | 6      | (a) <i>Cohort study</i> —Give the eligibility criteria, and the sources and methods of selection of participants. Describe methods of follow-up<br><i>Case-control study</i> —Give the eligibility criteria, and the sources and methods of case ascertainment and control selection. Give the rationale for the choice of cases and controls<br><i>Cross-sectional study</i> —Give the eligibility criteria, and the sources and methods of selection of participants | 4                  |
|                           |        | (b) <i>Cohort study</i> —For matched studies, give matching criteria and number of exposed and unexposed<br><i>Case-control study</i> —For matched studies, give matching criteria and the number of controls per case                                                                                                                                                                                                                                                 |                    |
| Variables                 | 7      | Clearly define all outcomes, exposures, predictors, potential confounders, and effect modifiers. Give diagnostic criteria, if applicable                                                                                                                                                                                                                                                                                                                               | 4                  |
| Data sources/ measurement | 8*     | For each variable of interest, give sources of data and details of methods of assessment (measurement). Describe comparability of assessment methods if there is more than one group                                                                                                                                                                                                                                                                                   | 4                  |
| Bias                      | 9      | Describe any efforts to address potential sources of bias                                                                                                                                                                                                                                                                                                                                                                                                              | 4                  |
| Study size                | 10     | Explain how the study size was arrived at                                                                                                                                                                                                                                                                                                                                                                                                                              | 4                  |
| Quantitative variables    | 11     | Explain how quantitative variables were handled in the analyses. If applicable, describe which groupings were chosen and why                                                                                                                                                                                                                                                                                                                                           | 4                  |
| Statistical methods       | 12     | (a) Describe all statistical methods, including those used to control for confounding                                                                                                                                                                                                                                                                                                                                                                                  | 4                  |
|                           |        | (b) Describe any methods used to examine subgroups and interactions                                                                                                                                                                                                                                                                                                                                                                                                    | NA                 |
|                           |        | (c) Explain how missing data were addressed                                                                                                                                                                                                                                                                                                                                                                                                                            | 5-6                |
|                           |        | (d) <i>Cohort study</i> —If applicable, explain how loss to follow-up was addressed<br><i>Case-control study</i> —If applicable, explain how matching of cases and controls was addressed                                                                                                                                                                                                                                                                              | NA                 |

|                          |     |                                                                                                                                                                                                              |     |
|--------------------------|-----|--------------------------------------------------------------------------------------------------------------------------------------------------------------------------------------------------------------|-----|
|                          |     | <i>Cross-sectional study</i> —If applicable, describe analytical methods taking account of sampling strategy                                                                                                 |     |
|                          |     | (e) Describe any sensitivity analyses                                                                                                                                                                        | NA  |
| <b>Results</b>           |     |                                                                                                                                                                                                              |     |
| Participants             | 13* | (a) Report numbers of individuals at each stage of study—eg numbers potentially eligible, examined for eligibility, confirmed eligible, included in the study, completing follow-up, and analysed            | NA  |
|                          |     | (b) Give reasons for non-participation at each stage                                                                                                                                                         | NA  |
|                          |     | (c) Consider use of a flow diagram                                                                                                                                                                           | NA  |
| Descriptive data         | 14* | (a) Give characteristics of study participants (eg demographic, clinical, social) and information on exposures and potential confounders                                                                     | 6-8 |
|                          |     | (b) Indicate number of participants with missing data for each variable of interest                                                                                                                          | 7-8 |
|                          |     | (c) <i>Cohort study</i> —Summarise follow-up time (eg, average and total amount)                                                                                                                             | 7-8 |
| Outcome data             | 15* | <i>Cohort study</i> —Report numbers of outcome events or summary measures over time                                                                                                                          | NA  |
|                          |     | <i>Case-control study</i> —Report numbers in each exposure category, or summary measures of exposure                                                                                                         | NA  |
|                          |     | <i>Cross-sectional study</i> —Report numbers of outcome events or summary measures                                                                                                                           | NA  |
| Main results             | 16  | (a) Give unadjusted estimates and, if applicable, confounder-adjusted estimates and their precision (eg, 95% confidence interval). Make clear which confounders were adjusted for and why they were included | NA  |
|                          |     | (b) Report category boundaries when continuous variables were categorized                                                                                                                                    | NA  |
|                          |     | (c) If relevant, consider translating estimates of relative risk into absolute risk for a meaningful time period                                                                                             | NA  |
| Other analyses           | 17  | Report other analyses done—eg analyses of subgroups and interactions, and sensitivity analyses                                                                                                               | NA  |
| <b>Discussion</b>        |     |                                                                                                                                                                                                              |     |
| Key results              | 18  | Summarise key results with reference to study objectives                                                                                                                                                     | 9   |
| Limitations              | 19  | Discuss limitations of the study, taking into account sources of potential bias or imprecision. Discuss both direction and magnitude of any potential bias                                                   | 9   |
| Interpretation           | 20  | Give a cautious overall interpretation of results considering objectives, limitations, multiplicity of analyses, results from similar studies, and other relevant evidence                                   | 10  |
| Generalisability         | 21  | Discuss the generalisability (external validity) of the study results                                                                                                                                        | 10  |
| <b>Other information</b> |     |                                                                                                                                                                                                              |     |
| Funding                  | 22  | Give the source of funding and the role of the funders for the present study and, if applicable, for the original study on which the present article is based                                                | 10  |

\*Give information separately for cases and controls in case-control studies and, if applicable, for exposed and unexposed groups in cohort and cross-sectional studies.

**Note:** An Explanation and Elaboration article discusses each checklist item and gives methodological background and published examples of transparent reporting. The STROBE checklist is best used in conjunction with this article (freely available on the Web sites of PLoS Medicine at <http://www.plosmedicine.org/>, Annals of Internal Medicine at <http://www.annals.org/>, and Epidemiology at <http://www.epidem.com/>). Information on the STROBE Initiative is available at [www.strobe-statement.org](http://www.strobe-statement.org).

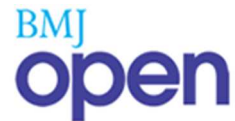

**Physician Directory: A challenge to measuring electronic health record adoption in a cohort of Connecticut physicians**

|                                 |                                                                                                                                                                  |
|---------------------------------|------------------------------------------------------------------------------------------------------------------------------------------------------------------|
| Journal:                        | <i>BMJ Open</i>                                                                                                                                                  |
| Manuscript ID:                  | bmjopen-2012-001066.R1                                                                                                                                           |
| Article Type:                   | Research                                                                                                                                                         |
| Date Submitted by the Author:   | 06-Sep-2012                                                                                                                                                      |
| Complete List of Authors:       | Tikoo, Minakshi; University of Connecticut, Community Medicine & Health Care                                                                                     |
| <b>Primary Subject Heading</b>: | Health informatics                                                                                                                                               |
| Secondary Subject Heading:      | Health services research                                                                                                                                         |
| Keywords:                       | Quality in health care < HEALTH SERVICES ADMINISTRATION & MANAGEMENT, physician directory, health information exchange, evaluation of HIEs, rate of EHR adoption |
|                                 |                                                                                                                                                                  |

SCHOLARONE™  
Manuscripts

Peer Review Only

## Physician Directory: A challenge to measuring electronic health record adoption in a cohort of Connecticut physicians

### ABSTRACT

**Objective** To assess the limitations of the existing physician directory in measuring electronic health record (EHR) adoption rates among a cohort of Connecticut physicians.

**Design** A population-based mailing assessed the number of physicians practicing in Connecticut.

**Measurements** Information about practice site, practices pertaining to storing of patient information, sources of revenue, and preferred method for receiving survey. Practice status in Connecticut, measured by yes and no. Demographic information was collected on gender, year of birth, race, and ethnicity.

**Results** The response rate for the postcard mailing was 19% (3,105/16,462). Of the 16,462 unduplicated consumers in our universe, 233 (1%) were retired and 5828 (35%) did not practice in CT. Of the 3,105 valid postcard responses we received, 2,159 were for physicians practicing in CT. Nine (0.4%) of these responses did not specify a preferred method for receiving the full physician survey; 91 physicians refused to participate in the survey; 2,159 surveys were sent out using each physician's requested method for receiving the survey, i.e. web-based, regular mail, or telephone. As of August 2012, 898 physicians had returned surveys, resulting in a response rate of 42%.

**Limitations** The postcard response rate based on the unduplicated lists adjusted for exclusions such as death, retired, and do not practice in CT, is 30%, which is low. We may be missing physician populations which could greatly affect the indicators being used to measure change in electronic health record adoption rates.

**Conclusions** It is difficult to obtain an accurate physician count of practicing physicians in Connecticut from the existing lists. States that are participating in the projects funded under various Office of the National Coordinator for Health Information Technology (ONC) initiatives must focus on getting an accurate count of the physicians practicing in their state, since their progress is being measured based on this key number.

### INTRODUCTION

The influx of American Recovery and Reinvestment Act of 2009 (ARRA) funding through the implementation of the Health Information Technology for Economic and Clinical Health (HITECH) Act provides funds to small, privately-owned primary care practices, federally-qualified health centers, critical area access hospitals, and other community health centers to implement and adopt health information technologies. These technologies include electronic health records (EHRs), e-prescribing systems, and laboratory information systems. These funds were made available to all states through multiple initiatives, such as the Health Information Technology Extension Program, State Health Information Exchange (HIE) Cooperative Agreement Program, and Community College Consortia to Educate Health Information Technology Professionals Program. Much has been written about the



1  
2 advantages of using HIEs and their resulting benefits to improving quality of care, patient safety, and  
3 efficiency of delivering care.(1-3)  
4

## 5 6 **BACKGROUND**

7  
8 The ONC has invested about \$30 billion to implement the HITECH Act.(4-7) The Health  
9 Information Technology Extension Program provides each state with funds to increase its physicians'  
10 EHR adoption rate. Similarly, under the HIE program, states are expected to build infrastructure and  
11 mechanisms that support the exchange of health information among physicians' offices, hospitals,  
12 laboratories, pharmacies, registries, etc. The HIE initiative funds 56 Health Information Exchanges  
13 covering all states. One metric indicative of HIE success is the rate of change in the EHR adoption rate  
14 among physicians over the course of this four-year initiative. This metric is linked to another outcome  
15 measure: the number of physicians who successfully demonstrate the exchange of summary  
16 documents with another provider, the state, or a regional HIE. To this end, accurate data on  
17 practicing physicians by state are needed. Data sources that list practicing physicians in a state,  
18 however, are limited (8), since generating accurate lists of unduplicated physicians in a state is a  
19 labor-intensive activity. As a result, this indicator presents a challenge, since it assumes that there is  
20 an existing accurate list of the physician population that can be used to survey the physicians for EHR  
21 adoption rates. Establishing an accurate baseline list of physicians is important, since progress on  
22 many HIT indicators will be based upon the number of physicians that adopt and implement EHRs and  
23 other HIT practices. These physicians are eligible for incentives from the Centers for Medicare and  
24 Medicaid Services (CMS).(9) Currently, many states realize that their physicians' lists are inaccurate;  
25 this makes it difficult for them to calculate this basic measure of existing physicians that use certified  
26 EHRs.  
27  
28  
29  
30  
31  
32  
33  
34  
35  
36  
37  
38  
39  
40  
41  
42

43  
44 In the first year of the HIE cooperative agreements, states have been working to establish a  
45 baseline for existing rates of EHR adoption. As part of this grant, ONC has established multiple  
46 communities of practice (CoP) targeting important performance outcome measures, including the e-  
47 prescribing CoP, the Lab CoP, provider directory CoP, and the Security and Privacy CoP. The "Provider  
48 Directory CoP" has been discussing the challenges associated with getting and subsequently  
49 maintaining an accurate list/directory of providers, which are related to the fact that physicians  
50 practice in multiple settings, change affiliations, and may not practice in all states in which they hold  
51 licenses.  
52  
53  
54  
55  
56  
57  
58  
59  
60

1  
2 In December 2010, the Centers for Disease Control and Prevention (CDC) released statewide  
3 results of EHR adoption rates, based on a mailed supplement to the National Ambulatory Medical  
4 Care Survey (NAMCS).(10) This supplement was started in 2008. The CDC study reports that 48% of  
5 office-based physicians use an EHR, 22% use a basic system, and 7% use a fully-functional EHR. These  
6 numbers are slightly higher than those reported in an earlier study; which reported 4% of the  
7 physicians as operating an extensive, fully-functional electronic system, while 13% had a basic  
8 system.(11)

9  
10  
11  
12  
13  
14  
15 Currently, these data are the only state-level estimates available that systematically record EHR  
16 adoption rates. There are, however, two limitations that impact the NAMCS data's applicability and  
17 usefulness. First, the supplement questionnaire does not ask the key question about whether or not  
18 the EHR in use is certified.(4) Second, the EHR adoption questions were asked at the practice level  
19 and not at the physician level. This distinction is important because the incentives which CMS is  
20 promoting are at the physician level and not at the practice level.

21  
22  
23  
24  
25  
26  
27 An HIE 2011 expert survey undertaken by CAQH and eHealth initiative to identify data elements  
28 needed to create provider directories, reported that provider directories are at the core of a  
29 successful exchange and need frequent updates. Additionally, they identified that health plans are  
30 the best source of provider information, followed by Medicaid offices, and providers themselves. (12)

31  
32  
33  
34 **Connecticut Health Information Exchange Landscape** The Health Information Technology  
35 Exchange of Connecticut (HITE-CT), a quasi-public agency, was created by the [Public Act 10-117](#), "*An*  
36 *Act Concerning Revisions to Public Health Related Statutes and the Establishment of the Health*  
37 *Information Technology Exchange of Connecticut*," Sec. 82-90,96 (codified at CGS §19a-750(c)(1))  
38 (13), by the 2010 Connecticut General Assembly and Governor Rell. It is managed by an appointed  
39 Board of Directors who held their first meeting in October 2010 to coordinate and oversee Health  
40 Information Exchange (HIE) activities starting in January 1, 2011. Each board member represents a  
41 constituent stakeholder group, such as consumer or consumer advocates, primary care physicians,  
42 pharmacists, employer and/or business groups.

43  
44  
45  
46  
47  
48  
49  
50  
51 According to NAMCS estimates for Connecticut, 48% of office-based physicians use an EHR and  
52 15% report having a basic EHR system (10), while another recent evaluation study puts this number at  
53 36%.(14) This paper addresses the challenges of measuring the rate of EHR adoption among  
54 physicians on this list.

## METHODS

**Data** The Connecticut Department of Public Health contracted with the University of Connecticut Health Center (UCHC) to evaluate its Health Information Technology and Exchange (HITE) Cooperative Agreement, funded by the Office of the National Coordinator (ONC). The contract period for this evaluation is 7/1/2010-3/14/2014. This evaluation uses mixed methods, namely survey research and in-depth interviews. A family of surveys is being undertaken to measure CT-HITE's impact, such as physician EHR adoption rate, e-prescribing practices, laboratory readiness for interoperability and states ability to sustain this effort after the federal funds are expended. All studies were reviewed by the IRB at UCHC.

For the physician survey implementation, the evaluators received a list from the Department of Public Health (DPH), which issues licenses of practice to physicians, generated a list of 16,618 physicians in May 2011 and another list of 5,283 physicians from the Department of Social Services Medicaid physician list. No phone numbers or e-mail addresses were available on this list. These lists were combined and after removing duplicates the final list contained a cohort of 18,642 physicians.

Members of the board of directors of HITE-CT believed that there were about 8,000 physicians actively practicing in Connecticut. Due to the discrepancy between the actual list and the number of physicians believed to be practicing in Connecticut, a two-step survey process was implemented to ascertain the list's accuracy. First, a postcard was mailed to all the physicians on the list. Second, surveys were mailed to physicians who responded to the postcard, to assess physicians use of EHRs; their opinions about their EHR's utility; their familiarity with HIE; and their opinions about barriers and incentives that may impact HIE implementation. This paper discusses the responses to the postcard.

**Postcard Survey instrument** The postcard asked 10 questions. These questions included whether the person practiced in Connecticut, age, race, ethnicity, gender, practice site, methods used to store medical record data, sources of patient revenue, and preferred methods for receiving the subsequent survey. Figure 1 contains a picture of the postcard.

**Postcard Administration** Every licensed physician who was on the list as of May 2011 was mailed a postcard through the US postal system. A total of 18,642 postcards was mailed.

**Analysis** Responses to the postcard mailing were analyzed using SQL and SPSS.

## RESULTS

We received 4,104 of the 18,642 postcards that were mailed. Of these, 999 were returned undelivered; nine respondents practiced in Connecticut but did not chose a preferred method for receiving a survey; and 2,159 were valid addresses with an identified method for receiving the physician survey. Additionally, 10 postcards were returned with a note that the physician had received two postcards. This led us to review the list closely for duplicate physicians. To do this, we systematically used the internet to search for telephone numbers for practices containing possible duplicate physicians, and we then called these practices to confirm that the physician on our list was still practicing at the address listed. Between the mailing and telephone calls to practices, 2,180 were identified as duplicates, 233 physicians were identified as having retired, and 5,828 were identified as not practicing in CT. A second mailing of 713 postcards was completed in November 2011 with updated addresses for postcards that were returned to us as undelivered from the first mailing. A subsequent third mailing was completed in March 2012, to 6,496 non-respondents from the first list. A fourth postcard mailing in May 2012 went to 117 physicians whose postcards from the third mailing had been returned undeliverable.

**Response rate** The overall postcard response rate was 19%. Of the 16,462 unduplicated physicians in the master list, 44 had died, 233 were retired, 5,828 no longer practiced in CT, and 30 did not specify whether or not they practiced in CT. This left an adjusted target population of 10,327 physicians; the response rate for this target population was 30%. Table 1 provides the results from the process undertaken to clean the master physician list.

Table 1: Cleaning physician list

|                                                           | N            | %     |
|-----------------------------------------------------------|--------------|-------|
| Physician list received from CT-DPH                       | 18642        |       |
| Duplicates in the list                                    | 2056         |       |
| Triplicates in the list                                   | 100          |       |
| Quadruplicates in the list                                | 12           |       |
| Quintuplicates in the list                                | <b>12</b>    |       |
| Unduplicated Physician list                               | <b>16462</b> |       |
| <b>Responses to the Physician postcard</b>                |              |       |
| No response                                               | 12358        | 75.1% |
| Postcard returned due to invalid address                  | 999          | 6.1%  |
| Postcard returned completed                               | 3105         | 18.9% |
| <b>Physicians Excluded Due to Death, Retirement, etc.</b> |              |       |
| Died                                                      | 44           | 0.3%% |

|                                                                                                              |       |       |
|--------------------------------------------------------------------------------------------------------------|-------|-------|
| Retired                                                                                                      | 233   | 1.4%  |
| No Longer Practices in CT                                                                                    | 5828  | 35.4% |
| Postcard returned: Unknown if Physician Practices in CT                                                      | 30    | 0.2%  |
| Target Population After Exclusions                                                                           | 10327 |       |
| Adjusted Postcard Response Rate Based on Target Population                                                   |       | 30.1% |
| <b>Physicians Receiving Full Survey</b>                                                                      |       |       |
| Refused to Participate in Survey                                                                             | 91    |       |
| Postcard Returned; No Preferred Survey Method Specified; Unable to Contact Physician to Get Preferred Method | 9     |       |
| Physician Practices in CT; Survey Sent                                                                       | 2159  |       |
| <i>Response rate for survey</i>                                                                              | 898   | 41.6% |

**Characteristics of respondents** The age of the physicians ranged from 28-91 years, representing a mean age of 55 years and a standard deviation of 12 years. Sixty-eight percent of the respondents were men and 31% were women. Eighty-three percent of the physicians selected white, while 11% selected Asian and 3% selected black as their race. Only 3% of the respondents were of Hispanic origin.

**Characteristics of the practice site** Most physicians (53%) reported practicing in a single-specialty group practice, 23% of the physicians practiced in a multi-specialty group practice, and 20% had a solo practice.

**Handling of patient records** Most physicians (36%) reported using only paper records, 29% reported using a combination of paper and computerized records, 27% were using EHRs, 4% were using scanned images of paper records, and 3% were in the process of moving to an EHR.

**Source of patient revenue** When asked about income, 43% reported that more than 30% of their revenue came from Medicare, 18% reported that more than 30% of their revenue came from Medicaid, 67% reported that more than 30% of their revenue came from private insurance, and about 7% reported that more than 30% of their revenue came from patient payments.

**Selection of method for survey administration** A majority (56%) of the physicians wanted to receive their survey in the mail, while 40% preferred the web-based survey. Demographic and sample characteristics are summarized in table 2.

Table 2: Demographics and other sample characteristics

|               | N=2159           | % |
|---------------|------------------|---|
| Mean Age      | 55 years (SD 12) |   |
| Range         | 28-91 years      |   |
| <b>Gender</b> |                  |   |

|                                                                         | <b>N=2159</b> | <b>%</b> |
|-------------------------------------------------------------------------|---------------|----------|
| Male                                                                    | 1460          | 67.6%    |
| Female                                                                  | 659           | 30.5%    |
| Missing                                                                 | 40            | 1.9%     |
| <b>Ethnicity</b>                                                        |               |          |
| Hispanic or Latino origin                                               | 74            | 3.4%     |
| Not Hispanic or Latino                                                  | 2017          | 93.4%    |
| Missing                                                                 | 68            | 3.1%     |
| <b>Race</b>                                                             |               |          |
| White                                                                   | 1784          | 82.6%    |
| Black/African-American                                                  | 55            | 2.5%     |
| Asian                                                                   | 228           | 10.6%    |
| Native Hawaiian/Other Pacific Islander                                  | 12            | 0.6%     |
| American Indian                                                         | 3             | 0.1%     |
| Multiple Races                                                          | 0             | 0.0%     |
| Missing                                                                 | 77            | 3.6%     |
| <b>Practice Type</b>                                                    |               |          |
| Solo practice                                                           | 433           | 19.7%    |
| Single specialty group                                                  | 1141          | 52.8%    |
| Multi-specialty group                                                   | 495           | 22.6%    |
| Did not respond                                                         | 90            | 4.2%     |
| <b>How does your main practice site store patient information</b>       |               |          |
| Paper medical records/charts stored in cabinets                         | 771           | 35.7%    |
| Both-Paper and computerized                                             | 621           | 28.8%    |
| Electronic Health Record                                                | 582           | 27.0%    |
| Computerized system which stores scanned copies of paper records (DIMS) | 94            | 4.4%     |
| Other                                                                   | 48            | 2.2%     |
| Multiple Storage Methods                                                | 30            | 1.4%     |
| Missing                                                                 | 13            | 0.6%     |
| <b>% of patient revenue, Medicare</b>                                   |               |          |
| None                                                                    | 95            | 4.4%     |
| Less than 30                                                            | 563           | 26.1%    |
| More than 30                                                            | 932           | 43.2%    |
| Missing                                                                 | 569           | 26.4%    |
| <b>% of patient revenue, Medicaid</b>                                   |               |          |
| None                                                                    | 138           | 6.4%     |
| Less than 30                                                            | 1031          | 47.7%    |
| More than 30                                                            | 390           | 18.1%    |
| Missing                                                                 | 600           | 27.8%    |
| <b>% of patient revenue, Private Insurance</b>                          |               |          |
| None                                                                    | 14            | 0.6%     |
| Less than 30                                                            | 358           | 16.6%    |
| More than 30                                                            | 1437          | 66.6%    |

|                                                  | N=2159 | %     |
|--------------------------------------------------|--------|-------|
| Missing                                          | 350    | 16.2% |
| <b>% of patient revenue, Patient Payments</b>    |        |       |
| None                                             | 23     | 1.1%  |
| Less than 30                                     | 1204   | 55.8% |
| More than 30                                     | 146    | 6.8%  |
| Missing                                          | 786    | 36.4% |
| <b>% of patient revenue, Other</b>               |        |       |
| None                                             | 36     | 1.7%  |
| Less than 30                                     | 151    | 7.0%  |
| More than 30                                     | 82     | 3.8%  |
| Missing                                          | 1890   | 87.5% |
| <b>Preferred method of survey administration</b> |        |       |
| Web-based                                        | 855    | 39.6% |
| Regular mail                                     | 1198   | 55.5% |
| Telephone interview                              | 21     | 1.0%  |
| In-person interview                              | 12     | 0.6%  |
| Multiple                                         | 16     | 0.7%  |
| Missing                                          | 57     | 2.6%  |

## DISCUSSION

The physician list was inadequate for the purpose of administering the survey as indicated by the difference between our start-up count of 18,642 and the final adjusted count of 10,327. DPH licenses physicians to practice in Connecticut, but does not maintain a list of practicing physicians. We found that physicians move, retire, graduate from medical school, and die. Any one of these issues by itself does not create a lot of noise, but together these issues render the list suspect for calculating outcome measures. At any given time it is difficult for the DPH or any other body to know who is practicing in the state of Connecticut. This issue is being identified as a challenge across states. (12) As work is being done to setup health information and health insurance exchanges, accurate provider directories are the first step in setting up functional exchanges for health provision and coordination.

Currently, DPH uses both electronic and paper processes for license renewal. We recommend that the state licensing and renewal application add two questions that may improve the list substantially over a period of one year, given that all physicians have to renew their licenses annually. First, physicians should be asked whether or not they practice in the state. Second, it may be useful to have all physicians designate the sites at which they practice; these sites should be flagged as either primary or secondary sites. This is important because, even though physicians may practice at

1  
2 multiple sites, we want them to respond to our survey based on their experience at their primary site.  
3  
4 Third, it may be time to mandate that all renewals be done electronically; this would eliminate the  
5  
6 process of merging the two sources of license renewal data to obtain a master list. Last, a subset of  
7  
8 these physicians will be applying to CMS for incentives. As a result, the projected number of  
9  
10 physicians who are likely to apply for these incentives could be off by a significant magnitude.

11  
12 There has been pressure on the states that received HIE grants to document baseline EHR  
13  
14 adoption rates quickly. This may not be feasible, given that it took a year to get the survey out into  
15  
16 the field and then realize that the list was not accurate. We were concurrently cleaning the list as we  
17  
18 were sending surveys out to physicians. It would have been more prudent to first clean the list and  
19  
20 then send out the postcard. Also, ONC would be better off allowing states to use the rates estimated  
21  
22 by NAMCS as their baselines; this would allow states the necessary time to get their provider  
23  
24 directories in order and to then implement a statewide physician survey based on the population or a  
25  
26 sample to measure change overtime in EHR adoption rates.

27  
28 Lastly, we feel that the two-step approach, using a postcard followed by a survey, is prudent in  
29  
30 two ways. First we would have wasted a lot of our funds had we just mailed out our survey at a cost  
31  
32 of \$1 per survey in comparison to 25 cents per postcard. Second, we were surprised that 56% of the  
33  
34 respondents preferred regular mail to web-based surveys. Given that most surveys with physicians  
35  
36 are done using the internet, we would have lost a lot of responses had we only used the web-based  
37  
38 method for survey administration.

39  
40 **Limitations** The postcard response rate is a challenge as the state tries to estimate how many of  
41  
42 its physicians will apply and attest successfully to receive incentive payments from CMS. The  
43  
44 evaluation team called the practices in the list to identify possible duplicates, since at least 50% of the  
45  
46 physicians indicate that they practice at more than one site. Cleaning of the physician list will need to  
47  
48 be an ongoing process, since every year new physicians are added to the existing list of licensed  
49  
50 physicians. It is possible that the question about “revenue sources (Q8)” may have depressed the  
51  
52 response rate, since physicians may have perceived this as a “Big Brother”-style question. It is  
53  
54 possible that the physicians feel “survey fatigue” or that they did not want to respond to this survey.  
55  
56 We believe that asking these questions on a license renewal application may yield better results,  
57  
58 since every physician in the state has to renew their license annually. Also, it is possible that  
59  
60



1  
2 respondents who chose 'no' or 'retired' to the first question did not return the survey as we did not  
3 have clear skip instructions asking them to return the survey even if they only answered Q1.  
4  
5  
6

## 7 8 **CONCLUSION**

9  
10 It is extremely difficult for states that do not have a centralized provider directory to maintain an  
11 accurate list of practicing providers. For such states, the environment scan data incorporated in the  
12 statewide strategic and operational plan submitted to the ONC may have some errors and limitations.  
13 Even though they might be the best baseline data available at the state level, ONC will need to be  
14 cautious in using this indicator, since the effort to clean the physician list is up to the state.  
15 Measuring progress on the EHR adoption indicator can be accurate only if all states use a systematic  
16 process for cleaning their lists of practicing physicians. In the state of Connecticut, we were able to  
17 remove duplicates from the list using a simple process of checking the internet, followed by calls to  
18 doctors' offices. Other states may want to follow this simple process if they do not have the funds  
19 available to buy systems and hire staff whose sole responsibility is to clean their physician list. As a  
20 result, each list's accuracy will vary proportional to the time and resources spent on cleaning the list.  
21  
22  
23  
24  
25  
26  
27  
28  
29  
30

31 Funding: This work was supported by Award Number 90HT0043/01 from the ONC.

### 32 **Competing Interests**

33 There are no competing interests.  
34  
35

### 36 **Data Sharing**

37 At this time these data are not available for public use as the study is still ongoing.  
38  
39  
40  
41  
42  
43

## 44 **References**

45  
46 (1) Wright A, Soran C, Jenter CA, et al. Physician attitudes toward health information exchange:  
47 Results of a statewide survey. J Am Med Inform Assoc 2010;17(1):66-70.  
48  
49

50 (2) Vest JR, Zhao H, Jaspersen J, et al. Factors motivating and affecting health information exchange  
51 usage. J Am Med Inform Assoc 2011;18(2):143-149.  
52  
53

54 (3) Adler-Milstein J, Bates DW, Jha AK. A survey of health information exchange organizations in the  
55 united states: Implications for meaningful use. Ann Intern Med 2011;154(10):666-671.  
56  
57  
58  
59  
60

- 1  
2 (4) Health information technology: initial set of standards, implementation specifications, and  
3 certification criteria for electronic health record technology. Interim final rule. Fed Regist  
4 2010;75(8):2013-2047.  
5  
6  
7 (5) Blumenthal D. Stimulating the adoption of health information technology. W V Med J 2009 May-  
8 Jun;105(3):28-29.  
9  
10  
11 (6) Blumenthal D, Tavenner M. The "meaningful use" regulation for electronic health records. N Engl J  
12 Med 2010 Aug 5;363(6):501-504.  
13  
14 (7) Blumenthal D. Launching HITECH. N Engl J Med 2010 Feb 4;362(5):382-385.  
15  
16  
17 (8) Jha AK, Doolan D, Grandt D, et al. The use of health information technology in seven nations. Int J  
18 Med Inf 2008;77(12):848-854.  
19  
20  
21 (9) Centers for Medicare & Medicaid Services. The official web-site for the Medicare and Medicaid  
22 EHR Incentive Program.  
23 [http://www.cms.gov/EHRIncentivePrograms/01\\_Overview.asp#TopOfPage](http://www.cms.gov/EHRIncentivePrograms/01_Overview.asp#TopOfPage). Accessed 20 November,  
24 2010.  
25  
26  
27 (10) Hsiao CJ, Beatty PC, Hing E, et al. Electronic medical record/electronic health record systems of  
28 office-based physicians: United States, 2009 and preliminary 2010. December 2010; Available at:  
29 [http://www.cdc.gov/nchs/data/hestat/emr\\_ehr\\_09/emr\\_ehr\\_09.pdf](http://www.cdc.gov/nchs/data/hestat/emr_ehr_09/emr_ehr_09.pdf). Accessed 14 November, 2011.  
30  
31  
32 (11) DesRoches CM, Campbell EG, Rao SR, et al. Electronic health records in ambulatory care - A  
33 national survey of physicians. N Engl J Med 2008;359(1):50-60.  
34  
35  
36 (12) CAQH and eHealth Initiative. [http://www.caqh.org/Host/UPD/Survey\\_CAQH®](http://www.caqh.org/Host/UPD/Survey_CAQH®) and eHealth  
37 Initiative: Health Information Exchange (HIE) and Provider Directory Survey Results  
38 HIEProviderDirectory.pdf. Accessed August 31, 2012.  
39  
40  
41 (13) State of Connecticut. Substitute Senate Bill No. 428, Public Act No. 10-117, An act concerning  
42 revisions to public health related statues and the establishment of health information technology  
43 exchange of Connecticut. Accessed 8 December, 2011.  
44  
45  
46 (14) Tikoo M. Connecticut's Health Information Technology Exchange Evaluation Process: Baseline  
47 Assessments & Updates, <http://www.cicats.uconn.edu/pdf/bmi/HITECT-Report.pdf>. Accessed 8  
48 December, 2011.  
49  
50  
51  
52  
53  
54  
55  
56  
57  
58  
59  
60

**STROBE 2007 (v4) checklist of items to be included in reports of observational studies in epidemiology\***  
**Checklist for cohort, case-control, and cross-sectional studies (combined)**

| Section/Topic             | Item # | Recommendation                                                                                                                                                                                                                                                                                                                                                                                                                                                         | Reported on page # |
|---------------------------|--------|------------------------------------------------------------------------------------------------------------------------------------------------------------------------------------------------------------------------------------------------------------------------------------------------------------------------------------------------------------------------------------------------------------------------------------------------------------------------|--------------------|
| Title and abstract        | 1      | (a) Indicate the study's design with a commonly used term in the title or the abstract                                                                                                                                                                                                                                                                                                                                                                                 | 1                  |
|                           |        | (b) Provide in the abstract an informative and balanced summary of what was done and what was found                                                                                                                                                                                                                                                                                                                                                                    |                    |
| <b>Introduction</b>       |        |                                                                                                                                                                                                                                                                                                                                                                                                                                                                        |                    |
| Background/rationale      | 2      | Explain the scientific background and rationale for the investigation being reported                                                                                                                                                                                                                                                                                                                                                                                   | 2                  |
| Objectives                | 3      | State specific objectives, including any pre-specified hypotheses                                                                                                                                                                                                                                                                                                                                                                                                      | 3                  |
| <b>Methods</b>            |        |                                                                                                                                                                                                                                                                                                                                                                                                                                                                        |                    |
| Study design              | 4      | Present key elements of study design early in the paper                                                                                                                                                                                                                                                                                                                                                                                                                | 4                  |
| Setting                   | 5      | Describe the setting, locations, and relevant dates, including periods of recruitment, exposure, follow-up, and data collection                                                                                                                                                                                                                                                                                                                                        | 4                  |
| Participants              | 6      | (a) <i>Cohort study</i> —Give the eligibility criteria, and the sources and methods of selection of participants. Describe methods of follow-up<br><i>Case-control study</i> —Give the eligibility criteria, and the sources and methods of case ascertainment and control selection. Give the rationale for the choice of cases and controls<br><i>Cross-sectional study</i> —Give the eligibility criteria, and the sources and methods of selection of participants | 4                  |
|                           |        | (b) <i>Cohort study</i> —For matched studies, give matching criteria and number of exposed and unexposed<br><i>Case-control study</i> —For matched studies, give matching criteria and the number of controls per case                                                                                                                                                                                                                                                 |                    |
| Variables                 | 7      | Clearly define all outcomes, exposures, predictors, potential confounders, and effect modifiers. Give diagnostic criteria, if applicable                                                                                                                                                                                                                                                                                                                               | 4                  |
| Data sources/ measurement | 8*     | For each variable of interest, give sources of data and details of methods of assessment (measurement). Describe comparability of assessment methods if there is more than one group                                                                                                                                                                                                                                                                                   | 4                  |
| Bias                      | 9      | Describe any efforts to address potential sources of bias                                                                                                                                                                                                                                                                                                                                                                                                              | 4                  |
| Study size                | 10     | Explain how the study size was arrived at                                                                                                                                                                                                                                                                                                                                                                                                                              | 4                  |
| Quantitative variables    | 11     | Explain how quantitative variables were handled in the analyses. If applicable, describe which groupings were chosen and why                                                                                                                                                                                                                                                                                                                                           | 4                  |
| Statistical methods       | 12     | (a) Describe all statistical methods, including those used to control for confounding                                                                                                                                                                                                                                                                                                                                                                                  | 4                  |
|                           |        | (b) Describe any methods used to examine subgroups and interactions                                                                                                                                                                                                                                                                                                                                                                                                    | NA                 |
|                           |        | (c) Explain how missing data were addressed                                                                                                                                                                                                                                                                                                                                                                                                                            | 5-6                |
|                           |        | (d) <i>Cohort study</i> —If applicable, explain how loss to follow-up was addressed<br><i>Case-control study</i> —If applicable, explain how matching of cases and controls was addressed                                                                                                                                                                                                                                                                              | NA                 |

|                          |     |                                                                                                                                                                                                              |     |
|--------------------------|-----|--------------------------------------------------------------------------------------------------------------------------------------------------------------------------------------------------------------|-----|
|                          |     | <i>Cross-sectional study</i> —If applicable, describe analytical methods taking account of sampling strategy                                                                                                 |     |
|                          |     | (e) Describe any sensitivity analyses                                                                                                                                                                        | NA  |
| <b>Results</b>           |     |                                                                                                                                                                                                              |     |
| Participants             | 13* | (a) Report numbers of individuals at each stage of study—eg numbers potentially eligible, examined for eligibility, confirmed eligible, included in the study, completing follow-up, and analysed            | NA  |
|                          |     | (b) Give reasons for non-participation at each stage                                                                                                                                                         | NA  |
|                          |     | (c) Consider use of a flow diagram                                                                                                                                                                           | NA  |
| Descriptive data         | 14* | (a) Give characteristics of study participants (eg demographic, clinical, social) and information on exposures and potential confounders                                                                     | 6-8 |
|                          |     | (b) Indicate number of participants with missing data for each variable of interest                                                                                                                          | 7-8 |
|                          |     | (c) <i>Cohort study</i> —Summarise follow-up time (eg, average and total amount)                                                                                                                             | 7-8 |
| Outcome data             | 15* | <i>Cohort study</i> —Report numbers of outcome events or summary measures over time                                                                                                                          | NA  |
|                          |     | <i>Case-control study</i> —Report numbers in each exposure category, or summary measures of exposure                                                                                                         | NA  |
|                          |     | <i>Cross-sectional study</i> —Report numbers of outcome events or summary measures                                                                                                                           | NA  |
| Main results             | 16  | (a) Give unadjusted estimates and, if applicable, confounder-adjusted estimates and their precision (eg, 95% confidence interval). Make clear which confounders were adjusted for and why they were included | NA  |
|                          |     | (b) Report category boundaries when continuous variables were categorized                                                                                                                                    | NA  |
|                          |     | (c) If relevant, consider translating estimates of relative risk into absolute risk for a meaningful time period                                                                                             | NA  |
| Other analyses           | 17  | Report other analyses done—eg analyses of subgroups and interactions, and sensitivity analyses                                                                                                               | NA  |
| <b>Discussion</b>        |     |                                                                                                                                                                                                              |     |
| Key results              | 18  | Summarise key results with reference to study objectives                                                                                                                                                     | 9   |
| Limitations              | 19  | Discuss limitations of the study, taking into account sources of potential bias or imprecision. Discuss both direction and magnitude of any potential bias                                                   | 9   |
| Interpretation           | 20  | Give a cautious overall interpretation of results considering objectives, limitations, multiplicity of analyses, results from similar studies, and other relevant evidence                                   | 10  |
| Generalisability         | 21  | Discuss the generalisability (external validity) of the study results                                                                                                                                        | 10  |
| <b>Other information</b> |     |                                                                                                                                                                                                              |     |
| Funding                  | 22  | Give the source of funding and the role of the funders for the present study and, if applicable, for the original study on which the present article is based                                                | 10  |

\*Give information separately for cases and controls in case-control studies and, if applicable, for exposed and unexposed groups in cohort and cross-sectional studies.

**Note:** An Explanation and Elaboration article discusses each checklist item and gives methodological background and published examples of transparent reporting. The STROBE checklist is best used in conjunction with this article (freely available on the Web sites of PLoS Medicine at <http://www.plosmedicine.org/>, Annals of Internal Medicine at <http://www.annals.org/>, and Epidemiology at <http://www.epidem.com/>). Information on the STROBE Initiative is available at [www.strobe-statement.org](http://www.strobe-statement.org).

## Physician Directory: A challenge to measuring electronic health record adoption in a cohort of Connecticut physicians

### ABSTRACT

**Objective** To assess the ~~challenges posed by limitations of~~ the existing physician directory in ~~the~~ measurement of electronic health record (EHR) adoption rates among a cohort of Connecticut physicians.

**Design** A population-based mailing ~~was undertaken to assess~~ the number of physicians practicing in Connecticut. ~~This mailing used a list of licensed physicians in Connecticut.~~

**Measurements** Information about practice site, practices pertaining to storing of patient information, sources of revenue, and preferred method for receiving survey. Practice status in Connecticut, measured by yes and no. Demographic information was collected on gender, year of birth, race, and ethnicity.

**Results** The response rate for the postcard mailing was 196% (~~2,5833,105~~/16,462). Of the 16,462 unduplicated consumers in our universe, ~~20633~~ (1%) were retired and ~~58284038~~ (3525%) did not practice in CT. Of the ~~3,1052,583~~ valid postcard responses we received, ~~2,1591,786~~ were for physicians practicing in CT. ~~SixtyNine~~ (0.43%) of these responses did not specify a preferred method for receiving the full physician survey; ~~26-91~~ physicians refused to participate in the survey; ~~1,7862,159~~ surveys were sent out using each physician's requested method for receiving the survey, i.e. web-based, regular mail, or telephone. As of ~~AugustFebruary~~ 2012, ~~785-898~~ physicians had returned surveys, resulting in a response rate of 424%.

**Limitations** The postcard response rate based on the unduplicated lists ~~adjusted for exclusions such as death, retired, and do not practice in CT, is of-3024%~~, which is low. We may be missing physician populations which could greatly affect the indicators being used to measure change in electronic health record adoption rates.

**Conclusions** It is difficult to obtain an accurate physician count of practicing physicians in Connecticut from the existing lists. States that are participating in the projects funded under various Office of the National Coordinator for Health Information Technology (ONC) initiatives must focus on getting an accurate count of the physicians practicing in their state, since their progress is being measured based on this key number.

### INTRODUCTION

The influx of American Recovery and Reinvestment Act of 2009 (ARRA) funding through the implementation of the Health Information Technology for Economic and Clinical Health (HITECH) Act provides funds to small, privately-owned primary care practices, federally-qualified health centers, critical area access hospitals, and other community health centers to implement and adopt health information technologies. These technologies include electronic health records (EHRs), e-prescribing systems, and laboratory information systems. These funds were made available to all states through multiple initiatives, such as the Health Information Technology Extension Program, State Health Information Exchange (HIE) Cooperative Agreement Program, and Community College Consortia to

Formatted: Not Highlight

Formatted: Not Highlight

1  
2  
3  
4  
5  
6  
7  
8 Educate Health Information Technology Professionals Program. Much has been written about the  
9 advantages of using HIEs and their resulting benefits to improving quality of care, patient safety, and  
10 efficiency of delivering care.(1-3)  
11

### 12 **BACKGROUND**

13  
14 The ONC has invested about \$30 billion to implement the HITECH Act.(4-7) The Health  
15 Information Technology Extension Program provides each state with funds to increase its physicians'  
16 EHR adoption rate. Similarly, under the HIE program, states are expected to build infrastructure and  
17 mechanisms that support the exchange of health information among physicians' offices, hospitals,  
18 laboratories, pharmacies, registries, etc. The HIE initiative funds 56 Health Information Exchanges  
19 covering all states. One metric indicative of HIE success is the rate of change in the EHR adoption rate  
20 among physicians over the course of this four-year initiative. This metric is linked to another outcome  
21 measure: the number of physicians who successfully demonstrate the exchange of summary  
22 documents with another provider, the state, or a regional HIE. To this end, accurate data on  
23 practicing physicians by state are needed. Data sources that list practicing physicians in a state,  
24 however, are limited (8), since generating accurate lists of unduplicated physicians in a state is a  
25 labor-intensive activity. As a result, this indicator presents a challenge, since it assumes that there is  
26 an existing accurate list of the physician population that can be used to survey the physicians for EHR  
27 adoption rates. Establishing an accurate baseline list of physicians is important, since progress on  
28 many HIT indicators will be based upon the number of physicians that adopt and implement EHRs and  
29 other HIT practices. These physicians are eligible for incentives from the Centers for Medicare and  
30 Medicaid Services (CMS).(9) Currently, many states realize that their physicians' lists are inaccurate;  
31 this makes it difficult for them to calculate this basic measure of existing physicians that use certified  
32 EHRs.  
33  
34

35  
36 In the first year of the HIE cooperative agreements, states have been working to establish a  
37 baseline for existing rates of EHR adoption. As part of this grant, ONC has established multiple  
38 communities of practice (CoP) targeting important performance outcome measures, including the e-  
39 prescribing CoP, the Lab CoP, provider directory CoP, and the Security and Privacy CoP. The "Provider  
40 Directory CoP" has been discussing the challenges associated with getting and subsequently  
41 maintaining an accurate list/directory of providers, which are related to the fact that physicians  
42  
43  
44  
45  
46  
47  
48  
49  
50  
51  
52  
53  
54  
55  
56  
57  
58  
59  
60

1  
2  
3  
4  
5  
6  
7  
8 practice in multiple settings, change affiliations, and may not practice in all states in which they hold  
9 licenses.

10  
11 In December 2010, the Centers for Disease Control and Prevention (CDC) released statewide  
12 results of EHR adoption rates, based on a mailed supplement to the National Ambulatory Medical  
13 Care Survey (NAMCS).(10) This supplement was started in 2008. The CDC study reports that 48% of  
14 office-based physicians use an EHR, 22% use a basic system, and 7% use a fully-functional EHR. These  
15 numbers are slightly higher than those reported in an earlier study; which reported 4% of the  
16 physicians as operating an extensive, fully-functional electronic system, while 13% had a basic  
17 system.(11)

18  
19 Currently, these data are the only state-level estimates available that systematically record EHR  
20 adoption rates. There are, however, two limitations that impact the NAMCS data's applicability and  
21 usefulness. First, the supplement questionnaire does not ask the key question about whether or not  
22 the EHR in use is certified.(4) Second, the EHR adoption questions were asked at the practice level  
23 and not at the physician level. This distinction is important because the incentives which CMS is  
24 promoting are at the physician level and not at the practice level.

25  
26 [An HIE 2011 expert survey undertaken by CAQH and eHealth initiative to identify data elements  
27 needed to create provider directories, reported that provider directories are at the core of a  
28 successful exchange and need frequent updates. Additionally, they identified that health plans are  
29 the best source of provider information, followed by Medicaid offices, and providers themselves. \(12\)](#)

30  
31 **Connecticut Health Information Exchange Landscape** The Health Information Technology  
32 Exchange of Connecticut (HITE-CT), a quasi-public agency, was created by the [Public Act 10-117](#), "*An  
33 Act Concerning Revisions to Public Health Related Statutes and the Establishment of the Health  
34 Information Technology Exchange of Connecticut*," Sec. 82-90,96 (codified at CGS §19a-750(c)(1))  
35 (13), by the 2010 Connecticut General Assembly and Governor Rell. It is managed by an appointed  
36 Board of Directors who held their first meeting in October 2010 to coordinate and oversee Health  
37 Information Exchange (HIE) activities starting in January 1, 2011. Each board member represents a  
38 constituent stakeholder group, such as consumer or consumer advocates, primary care physicians,  
39 pharmacists, employer and/or business groups.

40  
41 According to NAMCS estimates for Connecticut, 48% of office-based physicians use an EHR and  
42 15% report having a basic EHR system (10), while another recent evaluation study puts this number at  
43  
44  
45  
46  
47  
48  
49  
50  
51  
52

1  
2  
3  
4  
5  
6  
7  
8 | 36%.<sup>(143)</sup> This paper addresses the challenges of measuring the rate of EHR adoption among  
9 physicians on this list.  
10

## 11 12 13 **METHODS**

14 **Data** The Connecticut Department of Public Health contracted with the University of Connecticut Health  
15 Center (UCHC) to evaluate its Health Information Technology and Exchange (HITE) Cooperative Agreement,  
16 funded by the Office of the National Coordinator (ONC). The contract period for this evaluation is 7/1/2010-  
17 3/14/2014. This evaluation uses mixed methods, namely survey research and in-depth interviews. A family of  
18 surveys is being undertaken to measure CT-HITE's impact, such as physician EHR adoption rate, e-prescribing  
19 practices, laboratory readiness for interoperability and states ability to sustain this effort after the federal  
20 funds are expended. All studies were reviewed by the IRB at UCHC.  
21

22  
23  
24 For the physician survey implementation, the evaluators received a list from the Department of Public  
25 Health (DPH), which issues licenses of practice to physicians, generated a list of 16,618 physicians in  
26 May 2011 and another list of 5,283 physicians from the Department of Social Services Medicaid  
27 physician list. No phone numbers or e-mail addresses were available on this list. These lists were  
28 combined and after removing duplicates the final list contained a cohort of 18,642 physicians.  
29

30  
31 Members of the board of directors of HITE-CT believed that there were about 8,000 physicians  
32 actively practicing in Connecticut. Due to the discrepancy between the actual list and the number of  
33 physicians believed to be practicing in Connecticut, a two-step survey process was implemented to  
34 ascertain the list's accuracy. First, a postcard was mailed to all the physicians on the list. Second,  
35 surveys were mailed to physicians who responded to the postcard, to assess physicians use of EHRs;  
36 their opinions about their EHR's utility; their familiarity with HIE; and their opinions about barriers  
37 and incentives that may impact HIE implementation. This paper discusses the responses to the  
38 postcard.  
39

40  
41  
42 **Postcard Survey instrument** The postcard asked 10 questions. These questions included whether  
43 the person practiced in Connecticut, age, race, ethnicity, gender, practice site, methods used to store  
44 medical record data, sources of patient revenue, and preferred methods for receiving the subsequent  
45 survey. Figure 1 contains a picture of the postcard.  
46

47  
48  
49 **Postcard Administration** Every licensed physician who was on the list as of May 2011 was mailed  
50 a postcard through the US postal system. A total of 18,642 postcards was mailed.  
51

52 | **Analysis** Responses to the postcardfirst mailing were analyzed using SQL and SPSS.  
53  
54  
55  
56  
57  
58  
59  
60



Figure 1: Postcard Questions

Please complete the following survey and mail the postcard

|                                                                                                                                                                                                                                                                                                                                                                                                       |                                                                                                                                                                                                                                                                                                                         |
|-------------------------------------------------------------------------------------------------------------------------------------------------------------------------------------------------------------------------------------------------------------------------------------------------------------------------------------------------------------------------------------------------------|-------------------------------------------------------------------------------------------------------------------------------------------------------------------------------------------------------------------------------------------------------------------------------------------------------------------------|
| 1. Do you currently practice in the state of Connecticut?<br><input type="radio"/> Yes <input type="radio"/> No <input type="radio"/> Retired                                                                                                                                                                                                                                                         | ID                                                                                                                                                                                                                                   |
| 2. Your main practice site is :<br><input type="radio"/> Single specialty group/partnership<br><input type="radio"/> Multi specialty group/partnership<br><input type="radio"/> Solo practice                                                                                                                                                                                                         | 8. Roughly what percent of your patient revenue comes from the following? (Percentage should total 100%)<br>Medicare _____<br>Medicaid (including Husky, SAGA Medicaid LIA & Title 19) _____<br>Private insurance _____<br>Patient payments _____<br>Other (please specify) _____                                       |
| 3. How does your main practice site store patient information?<br><input type="radio"/> Paper medical records/charts stored in cabinets<br><input type="radio"/> Computerized system which stores scanned copies of paper records (DIMS)<br><input type="radio"/> Electronic Health Record<br><input type="radio"/> Both –paper and computerized<br><input type="radio"/> Other please specify: _____ | 9. Which method of survey administration do you prefer?<br><input type="radio"/> Web-based (we will email you a survey link)<br><input type="radio"/> Regular mail<br><br><input type="radio"/> Telephone interview<br><input type="radio"/> In Person interview<br><input type="radio"/> Do not want to receive survey |
| 4. What is the year of your birth? _____                                                                                                                                                                                                                                                                                                                                                              |                                                                                                                                                                                                                                                                                                                         |
| 5. What is your gender? <input type="radio"/> Male <input type="radio"/> Female                                                                                                                                                                                                                                                                                                                       |                                                                                                                                                                                                                                                                                                                         |
| 6. What is your ethnicity? <input type="radio"/> Hispanic or Latino<br><input type="radio"/> Not Hispanic or Latino                                                                                                                                                                                                                                                                                   |                                                                                                                                                                                                                                                                                                                         |
| 7. What is your race?<br><input type="radio"/> White<br><input type="radio"/> Black/African American<br><input type="radio"/> Asian<br><input type="radio"/> Native Hawaiian/Other Pacific Islander<br><input type="radio"/> American Indian/Alaska Native                                                                                                                                            | Please supply us with the following information<br>Email address: _____<br>Telephone number: _____                                                                                                                                                                                                                      |

**RESULTS**

We received 3,4594,104 of the 18,642 postcards that were mailed. Of these, 876-999 were returned undelivered; 59nine respondents practiced in Connecticut but did not chose a preferred method for receiving a survey; and 2,1594,740 were valid addresses with an identified method for receiving the physician survey. Additionally, 10 postcards were returned with a note that the physician had received two postcards. This led us ~~to decide~~ to review the list closely for duplicate physicians. To do this, we systematically used the internet to search for telephone numbers for practices containing possible duplicate physicians, and we then called these practices to confirm that the physician on our list was still practicing at the address listed. Between the mailing and telephone calls to practices, 2,180 were identified as duplicates, 206233 physicians were identified as having retired, and 40385,828 were identified as not practicing in CT. A second mailing of 698713 postcards was completed in November 2011 with updated addresses for postcards that were returned to us as undelivered from the first mailing. A subsequent third mailing was completed in March 2012, to 6,496 non-respondents from the first list. A fourth postcard mailing in May 2012 went to 117 physicians whose postcards from the third mailing had been returned undeliverable.

**Response rate** The overall postcard response rate was 169%. Of the 16,462 unduplicated physicians in the master list, 3044 had died, 206233 were retired, 40385,828 no longer practiced in

Formatted: Not Highlight

CT, and ~~1530~~ did not specify whether or not they practiced in CT. This left an adjusted target population of ~~10,327~~~~12,173~~ physicians; the response rate for this target population was ~~21.30~~%. Table 1 provides the results from the process undertaken to clean the master physician list.

Table 1: Cleaning physician list

|                                                                                                                     | N                                     | %                                 |
|---------------------------------------------------------------------------------------------------------------------|---------------------------------------|-----------------------------------|
| Physician list received from CT-DPH                                                                                 | 18642                                 |                                   |
| Duplicates in the list                                                                                              | 2056                                  |                                   |
| Triplicates in the list                                                                                             | 100                                   |                                   |
| Quadruplicates in the list                                                                                          | 12                                    |                                   |
| Quintuplicates in the list                                                                                          | 12                                    |                                   |
| Unduplicated Physician list                                                                                         | 16462                                 |                                   |
| <b>Responses to the Physician postcard</b>                                                                          |                                       |                                   |
| No response                                                                                                         | <del>12358</del> <del>1300</del><br>3 | <del>75.179</del> <del>.0</del> % |
| Postcard returned due to invalid address                                                                            | <del>999</del> <del>876</del>         | <del>6.15</del> <del>.3</del> %   |
| Postcard returned completed                                                                                         | <del>3105</del> <del>2583</del>       | <del>18.915</del> <del>.7</del> % |
| <b>Physicians Excluded Due to Death, Retirement, etc.</b>                                                           |                                       |                                   |
| Died                                                                                                                | <del>3044</del>                       | <del>0.3</del> <del>0.2</del> %   |
| Retired                                                                                                             | <del>233</del> <del>206</del>         | <del>1.41</del> <del>.3</del> %   |
| No Longer Practices in CT                                                                                           | <del>5828</del> <del>4038</del>       | <del>35.424</del> <del>.5</del> % |
| Postcard returned: Unknown if Physician Practices in CT                                                             | <del>3015</del>                       | <del>0.20</del> <del>.1</del> %   |
| Target Population After Exclusions                                                                                  | <del>12173</del> <del>1032</del><br>7 |                                   |
| Adjusted Postcard Response Rate Based on Target Population                                                          |                                       | <del>30.121</del> <del>.3</del> % |
| <b>Physicians Receiving Full Survey</b>                                                                             |                                       |                                   |
| Refused to Participate in Survey                                                                                    | <del>2691</del>                       |                                   |
| Postcard Returned; No Preferred Survey Method Specified; <u>Unable to Contact Physician to Get Preferred Method</u> | <del>609</del>                        |                                   |
| Physician Practices in CT; Survey Sent                                                                              | <del>1786</del> <del>2159</del>       |                                   |
| <i>Response rate for survey</i>                                                                                     | <del>898</del> <del>785</del>         | <del>41.644</del> <del>.0</del> % |

**Characteristics of respondents** The age of the physicians ranged from 28-91 years, representing a mean age of 55 years and a standard deviation of 12 years. Sixty-~~eight~~~~two~~ percent of the respondents were men and ~~27.31~~% were women. Eighty-~~three~~~~two~~ percent of the physicians selected white, while 11% selected Asian and ~~32~~% selected black as their race. Only ~~34~~% of the respondents were of Hispanic origin.

**Characteristics of the practice site** Most physicians (53%) reported practicing in a single-specialty group practice, 23.2% of the physicians practiced in a multi-specialty group practice, and 20% had a solo practice.

**Handling of patient records** Most physicians (36%) reported using only paper records, 29% reported using a combination of paper and computerized records, 27.6% were using EHRs, 5.4% were using scanned images of paper records, and 3% were in the process of moving to an EHR.

**Source of patient revenue** When asked about income, 43% reported that more than 30% of their revenue came from Medicare, 18.9% reported that more than 30% of their revenue came from Medicaid, 66.7% reported that more than 30% of their revenue came from private insurance, and about 7% reported that more than 30% of their revenue came from patient payments.

**Selection of method for survey administration** A majority (56.4%) of the physicians wanted to receive their survey in the mail, while 40.4% preferred the web-based survey. Demographic and sample characteristics are summarized in table 2.

Table 2: Demographics and other sample characteristics

|                                        | N=17992159       | %         |
|----------------------------------------|------------------|-----------|
| Mean Age                               | 55 years (SD 12) |           |
| Range                                  | 28-91 years      |           |
| <b>Gender</b>                          |                  |           |
| Male                                   | 14601110         | 67.661.7% |
| Female                                 | 659492           | 30.527.3% |
| Missing                                | 40197            | 1.911.0%  |
| <b>Ethnicity</b>                       |                  |           |
| Hispanic or Latino origin              | 7464             | 3.43.6%   |
| Not Hispanic or Latino                 | 20171678         | 93.493.3% |
| Missing                                | 6857             | 3.13.2%   |
| <b>Race</b>                            |                  |           |
| White                                  | 17841481         | 82.682.3% |
| Black/African-American                 | 5544             | 2.52.4%   |
| Asian                                  | 228198           | 10.611.0% |
| Native Hawaiian/Other Pacific Islander | 1210             | 0.6%      |
| American Indian                        | 3                | 0.10.2%   |
| Multiple Races                         | 0                | 0.0%      |
| Missing                                | 7763             | 3.63.5%   |
| <b>Practice Type</b>                   |                  |           |
| Solo practice                          | 433365           | 19.720.3% |
| Single specialty group                 | 1141950          | 52.8%     |
| Multi-specialty group                  | 495403           | 22.622.4% |

7

|                                                                         | N=17992159 | %         |
|-------------------------------------------------------------------------|------------|-----------|
| Did not respond                                                         | 8490       | 4.24.5%   |
| <b>How does your main practice site store patient information</b>       |            |           |
| Paper medical records/charts stored in cabinets                         | 771649     | 35.736.1% |
| Both-Paper and computerized                                             | 621517     | 28.828.7% |
| Electronic Health Record                                                | 582473     | 27.026.3% |
| Computerized system which stores scanned copies of paper records (DIMS) | 9488       | 4.44.9%   |
| Other                                                                   | 4848       | 2.22.7%   |
| Multiple Storage Methods                                                | 3012       | 1.40.7%   |
| Missing                                                                 | 1312       | 0.60.7%   |
| <b>% of patient revenue, Medicare</b>                                   |            |           |
| None                                                                    | 95109      | 4.46.1%   |
| Less than 30                                                            | 563478     | 26.126.6% |
| More than 30                                                            | 932769     | 43.242.7% |
| Missing                                                                 | 569443     | 26.424.6% |
| <b>% of patient revenue, Medicaid</b>                                   |            |           |
| None                                                                    | 138132     | 76.4.3%   |
| Less than 30                                                            | 1031869    | 47.748.3% |
| More than 30                                                            | 390333     | 18.118.5% |
| Missing                                                                 | 600465     | 27.825.8% |
| <b>% of patient revenue, Private Insurance</b>                          |            |           |
| None                                                                    | 1436       | 0.62.0%   |
| Less than 30                                                            | 358321     | 16.617.8% |
| More than 30                                                            | 14371180   | 66.665.6% |
| Missing                                                                 | 350262     | 16.214.6% |
| <b>% of patient revenue, Patient Payments</b>                           |            |           |
| None                                                                    | 2372       | 1.14.0%   |
| Less than 30                                                            | 12041012   | 55.856.3% |
| More than 30                                                            | 146125     | 6.86.9%   |
| Missing                                                                 | 786590     | 36.432.8% |
| <b>% of patient revenue, Other</b>                                      |            |           |
| None                                                                    | 36163      | 91.7.1%   |
| Less than 30                                                            | 151138     | 7.07.7%   |
| More than 30                                                            | 8082       | 3.84.4%   |
| Missing                                                                 | 14181890   | 87.578.8% |
| <b>Preferred method of survey administration</b>                        |            |           |
| Web-based                                                               | 855736     | 39.640.9% |
| Regular mail                                                            | 1198962    | 55.553.5% |
| Telephone interview                                                     | 21         | 1.01.2%   |
| In-person interview                                                     | 12         | 0.60.7%   |
| Multiple                                                                | 169        | 0.70.5%   |
| Missing                                                                 | 5957       | 2.63.3%   |

## DISCUSSION

The physician list was inadequate for the purpose of administering the survey as indicated by the difference between our start-up count of 18,642 and the final adjusted count of 10,327. DPH licenses physicians to practice in Connecticut, but does not maintain a list of practicing physicians. We found that physicians move, retire, graduate from medical school, and die. Any one of these issues by itself does not create a lot of noise, but together these issues render the list suspect for calculating outcome measures. At any given time it is difficult for the DPH or any other body to know who is practicing in the state of Connecticut. This issue is being identified as a challenge across states. (12) As work is being done to setup health information and health insurance exchanges, accurate provider directories are the first step in setting up functional exchanges for health provision and coordination.

Currently, DPH uses both electronic and paper processes for license renewal. We recommend that the state licensing and renewal application add two questions that may improve the list substantially over a period of one year, given that all physicians have to renew their licenses annually. First, physicians should be asked whether or not they practice in the state. Second, it may be useful to have all physicians designate the sites at which they practice; these sites should be flagged as either primary or secondary sites. This is important because, even though physicians may practice at multiple sites, we want them to respond to our survey based on their experience at their primary site. Third, it may be time to mandate that all renewals be done electronically; this would eliminate the process of merging the two sources of license renewal data to obtain a master list. Last, a subset of these physicians will be applying to CMS for incentives. As a result, the projected number of physicians who are likely to apply for these incentives could be off by a significant magnitude.

There has been pressure on the states that received HIE grants to document baseline EHR adoption rates quickly. This may not be feasible, given that it took a year to get the survey out into the field and then realize that the list was not accurate. We were concurrently cleaning the list as we were sending surveys out to physicians. It would have been more prudent to first clean the list and then send out the postcard. Also, ONC would be better off allowing states to use the rates estimated by NAMCS as their baselines; this would allow states the necessary time to get their provider directories in order and to then implement a statewide physician survey based on the population or a sample to measure change overtime in EHR adoption rates.

1  
2  
3  
4  
5  
6  
7  
8 Lastly, we feel that the two-step approach, using a postcard followed by a survey, is prudent in  
9 two ways. First we would have wasted a lot of our funds had we just mailed out our survey at a cost  
10 of \$1 per survey in comparison to 25 cents per postcard. Second, we were surprised that 56% of the  
11 respondents preferred regular mail to web-based surveys. Given that most surveys with physicians  
12 are done using the internet, we would have lost a lot of responses had we only used the web-based  
13 method for survey administration.

14  
15  
16  
17 **Limitations** The postcard response rate is a challenge as the state tries to estimate how many of  
18 its physicians will apply and attest successfully to receive incentive payments from CMS. The  
19 evaluation team ~~is calling~~ the practices in the list to identify possible duplicates, since at least 50%  
20 of the physicians indicate that they practice at more than one site. Cleaning of the physician list will  
21 need to be an ongoing process, ~~since~~ ~~as~~ every year new physicians are added to the existing list of  
22 licensed physicians. It is possible that the question about “revenue sources (Q8)” may have depressed  
23 the response rate, since physicians may have perceived this as a “Big Brother”-style question. It is  
24 possible that the physicians feel “survey fatigue” or that they did not want to respond to this survey.  
25 We believe that asking these questions on a license renewal application may yield better results,  
26 since every physician in the state has to renew their license annually. Also, it is possible that  
27 respondents who chose ‘no’ or ‘retired’ to the first question did not return the survey as we did not  
28 have clear skip instructions asking them to return the survey even if they only answered Q1.

## 35 36 CONCLUSION

37  
38 It is extremely difficult for states that do not have a centralized provider directory to maintain an  
39 accurate list of practicing providers. For such states, the environment scan data incorporated in the  
40 statewide strategic and operational plan submitted to the ONC may have some errors and limitations.  
41 Even though they might be the best baseline data available at the state level, ONC will need to be  
42 cautious in using this indicator, since the effort to clean the physician list is up to the state.  
43 Measuring progress on the EHR adoption indicator can be accurate only if all states use a systematic  
44 process for cleaning their lists of practicing physicians. In the state of Connecticut, we were able to  
45 remove duplicates from the list using a simple process of checking the internet, followed by calls to  
46 doctors’ offices. Other states may want to follow this simple process if they do not have the funds  
47  
48  
49  
50  
51  
52  
53  
54  
55  
56  
57  
58  
59  
60

1  
2  
3  
4  
5  
6  
7  
8 available to buy systems and hire staff whose sole responsibility is to clean their physician list. As a  
9 result, each list's accuracy will vary proportional to the time and resources spent on cleaning the list.  
10

11  
12 Funding: This work was supported by Award Number 90HT0043/01 from the ONC.  
13

#### 14 References

- 15  
16 (1) Wright A, Soran C, Jenter CA, Volk LA, Bates DW, Simon SR. Physician attitudes toward health  
17 information exchange: Results of a statewide survey. *J Am Med Inform Assoc* 2010;17(1):66-70.  
18  
19 (2) Vest JR, Zhao H, Jaspersen J, Gamm LD, Ohsfeldt RL. Factors motivating and affecting health  
20 information exchange usage. *J Am Med Inform Assoc* 2011;18(2):143-149.  
21  
22 (3) Adler-Milstein J, Bates DW, Jha AK. A survey of health information exchange organizations in the  
23 united states: Implications for meaningful use. *Ann Intern Med* 2011;154(10):666-671.  
24  
25 (4) Health information technology: initial set of standards, implementation specifications, and  
26 certification criteria for electronic health record technology. Interim final rule. *Fed Regist*  
27 2010;75(8):2013-2047.  
28  
29 (5) Blumenthal D. Stimulating the adoption of health information technology. *W V Med J* 2009 May-  
30 Jun;105(3):28-29.  
31  
32 (6) Blumenthal D, Tavenner M. The "meaningful use" regulation for electronic health records. *N Engl J*  
33 *Med* 2010 Aug 5;363(6):501-504.  
34  
35 (7) Blumenthal D. Launching HITECH. *N Engl J Med* 2010 Feb 4;362(5):382-385.  
36  
37 (8) Jha AK, Doolan D, Grandt D, Scott T, Bates DW. The use of health information technology in seven  
38 nations. *Int J Med Inf* 2008;77(12):848-854.  
39  
40 (9) Centers for Medicare & Medicaid Services. The official web-site for the Medicare and Medicaid  
41 EHR Incentive Program.  
42 [http://www.cms.gov/EHRIncentivePrograms/01\\_Overview.asp#TopOfPage](http://www.cms.gov/EHRIncentivePrograms/01_Overview.asp#TopOfPage). Accessed 20 November,  
43 2010.  
44  
45 (10) Hsiao CJ, Beatty PC, Hing E, Woodwell DA, Rechtsteiner EA, Sisk JE. Electronic medical  
46 record/electronic health record systems of office-based physicians: United States, 2009 and  
47 preliminary 2010. December 2010; Available at:  
48 [http://www.cdc.gov/nchs/data/hestat/emr\\_ehr\\_09/emr\\_ehr\\_09.pdf](http://www.cdc.gov/nchs/data/hestat/emr_ehr_09/emr_ehr_09.pdf). Accessed 14 November, 2011.  
49  
50 (11) DesRoches CM, Campbell EG, Rao SR, Donelan K, Ferris TG, Jha A, et al. Electronic health records  
51 in ambulatory care - A national survey of physicians. *N Engl J Med* 2008;359(1):50-60.  
52  
53  
54  
55  
56  
57  
58  
59  
60

1  
2  
3  
4  
5  
6  
7  
8  
9  
10  
11  
12  
13  
14  
15  
16  
17  
18  
19  
20  
21  
22  
23  
24  
25  
26  
27  
28  
29  
30  
31  
32  
33  
34  
35  
36  
37  
38  
39  
40  
41  
42  
43  
44  
45  
46  
47  
48  
49  
50  
51  
52  
53  
54  
55  
56  
57  
58  
59  
60

(12) CAQH and eHealth Initiative. [http://www.caqh.org/Host/UPD/Survey CAQH® and eHealth Initiative: Health Information Exchange \(HIE\) and Provider Directory Survey Results HIEProviderDirectory.pdf](http://www.caqh.org/Host/UPD/Survey_CAQH®_and_eHealth_Initiative:_Health_Information_Exchange_(HIE)_and_Provider_Directory_Survey_Results_HIEProviderDirectory.pdf). Accessed August 31, 2012.

(13) State of Connecticut. Substitute Senate Bill No. 428, Public Act No. 10-117, An act concerning revisions to public health related statues and the establishment of health information technology exchange of Connecticut. Accessed 8 December, 2011.

(14) Tikoo M. Connecticut’s Health Information Technology Exchange Evaluation Process: Baseline Assessments & Updates, <http://www.cicats.uconn.edu/pdf/bmi/HITECT-Report.pdf>. Accessed 8 December, 2011.

Formatted: Font: (Default) +Body (Calibri), 12 pt

Formatted: Font: (Default) +Body (Calibri)

For peer review only



Figure 1: Postcard Questions

Please complete the following survey and mail the postcard

|                                                                                                                                                                                                                                                                                                                                                                                                                        |                                                                                                                                                                                                                                                                                                                                                                          |
|------------------------------------------------------------------------------------------------------------------------------------------------------------------------------------------------------------------------------------------------------------------------------------------------------------------------------------------------------------------------------------------------------------------------|--------------------------------------------------------------------------------------------------------------------------------------------------------------------------------------------------------------------------------------------------------------------------------------------------------------------------------------------------------------------------|
| <p>1. Do you currently practice in the state of Connecticut?<br/> <input type="radio"/> Yes <input type="radio"/> No <input type="radio"/> Retired</p>                                                                                                                                                                                                                                                                 |  <p>ID _____</p>                                                                                                                                                                                                                                                                      |
| <p>2. Your main practice site is :<br/> <input type="radio"/> Single specialty group/partnership<br/> <input type="radio"/> Multi specialty group/partnership<br/> <input type="radio"/> Solo practice</p>                                                                                                                                                                                                             | <p>8. Roughly what percent of your patient revenue comes from the following? (Percentage should total 100%)</p> <p>Medicare _____<br/>                 Medicaid (including Husky, SAGA Medicaid LIA &amp; Title 19) _____<br/>                 Private insurance _____<br/>                 Patient payments _____<br/>                 Other (please specify) _____</p> |
| <p>3. How does your main practice site store patient information?<br/> <input type="radio"/> Paper medical records/charts stored in cabinets<br/> <input type="radio"/> Computerized system which stores scanned copies of paper records (DIMS)<br/> <input type="radio"/> Electronic Health Record<br/> <input type="radio"/> Both –paper and computerized<br/> <input type="radio"/> Other please specify: _____</p> | <p>9. Which method of survey administration do you prefer?</p> <p><input type="radio"/> Web-based (we will email you a survey link)<br/> <input type="radio"/> Regular mail</p> <p><input type="radio"/> Telephone interview<br/> <input type="radio"/> In Person interview<br/> <input type="radio"/> Do not want to receive survey</p>                                 |
| <p>4. What is the year of your birth? _____</p>                                                                                                                                                                                                                                                                                                                                                                        | <p>Please supply us with the following information</p> <p>Email address: _____</p> <p>Telephone number: _____</p>                                                                                                                                                                                                                                                        |
| <p>5. What is your gender? <input type="radio"/> Male <input type="radio"/> Female</p>                                                                                                                                                                                                                                                                                                                                 |                                                                                                                                                                                                                                                                                                                                                                          |
| <p>6. What is your ethnicity? <input type="radio"/> Hispanic or Latino<br/> <input type="radio"/> Not Hispanic or Latino</p>                                                                                                                                                                                                                                                                                           |                                                                                                                                                                                                                                                                                                                                                                          |
| <p>7. What is your race?<br/> <input type="radio"/> White<br/> <input type="radio"/> Black/African American<br/> <input type="radio"/> Asian<br/> <input type="radio"/> Native Hawaiian/Other Pacific Islander<br/> <input type="radio"/> American Indian/Alaska Native</p>                                                                                                                                            |                                                                                                                                                                                                                                                                                                                                                                          |

Review only

1  
2  
3  
4  
5  
6  
7  
8  
9  
10  
11  
12  
13  
14  
15  
16  
17  
18  
19  
20  
21  
22  
23  
24  
25  
26  
27  
28  
29  
30  
31  
32  
33  
34  
35  
36  
37  
38  
39  
40  
41  
42  
43  
44  
45  
46  
47  
48  
49  
50  
51  
52  
53  
54  
55  
56  
57  
58  
59  
60
